# Supplementary material for: Below-cloud scavenging of aerosol by rain: a review of numerical modelling approaches and sensitivity simulations with mineral dust in the Met Office's Unified Model
Source: Copernicus journal article supplement (doi:10.5194/acp-22-11381-2022), 2022-09-06
Supplement: Supplementary file 1 [file acp-22-11381-2022-supplement.pdf]

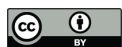

*Supplement of*

## **Below-cloud scavenging of aerosol by rain: a review of numerical modelling approaches and sensitivity simulations with mineral dust in the Met Office's Unified Model**

**Anthony C. Jones et al.**

*Correspondence to:* Anthony C. Jones ([anthony.jones@metoffice.gov.uk](mailto:anthony.jones@metoffice.gov.uk))

The copyright of individual parts of the supplement might differ from the article licence.

# Supplement to “Below-cloud scavenging of aerosol by rain: A review of numerical modelling approaches” by A.C. Jones *et al.*

## S1 Terminal velocity of falling raindrops and particles

Reynold’s number  $Re$ , a measure of whether flow is laminar or turbulent around an obstacle, is dependent on the terminal velocity of the particulate being measured. This creates an issue for liquid particles with diameter ( $D_d$ ) greater than 20  $\mu\text{m}$  that do not remain spherical as they fall. For these larger particles (e.g., raindrops) implicit formulae following Beard (1976) are used.

Firstly, we define fundamental variables which will be used throughout this Supplement. Equation S1 is the ideal gas law which relates air density ( $\rho_a$ ,  $\text{kg m}^{-3}$ ) to air pressure ( $P_a$ , Pa), temperature ( $T_a$ , K), and the specific gas constant ( $R_a = 287.05 \text{ J kg}^{-1} \text{ K}^{-1}$ ). Equation S2 relates the mean speed of air molecules ( $v_a$ ,  $\text{m s}^{-1}$ ) to the Boltzmann constant ( $k_B = 1.3804 \times 10^{-23} \text{ J K}^{-1}$ ),  $T_a$ , and the molecular mass ( $m_a = 4.78 \times 10^{-26} \text{ kg}$ ). Equation S3 is the Sutherland Law according to List (1984), which relates the dynamic viscosity of air ( $\mu_a$ ,  $\text{kg m}^{-1} \text{ s}^{-1}$ ) to  $T_a$ . The constants in Eq. S3 are  $S = 120 \text{ K}$ ,  $T_0 = 296.16 \text{ K}$ , and  $\mu_0 = 1.83 \times 10^{-5} \text{ kg m}^{-1} \text{ s}^{-1}$ . Equation S4 relates the mean free path of air molecules ( $\lambda_a$ , m) to  $\mu_a$ ,  $\rho_a$ , and  $v_a$ . These variables are already used throughout UKCA-mode.  $\mu_a$  and  $\lambda_a$  are determined at the start of the timestep in UKCA-mode.

$$\rho_a = \frac{P_a}{R_a T_a} \quad (\text{Eq. S1})$$

$$v_a = \left( \frac{8k_B T_a}{\pi m_a} \right)^{1/2} \quad (\text{Eq. S2})$$

$$\mu_a = \mu_0 \left( \frac{T_0 + S}{T_a + S} \right) \left( \frac{T_a}{T_0} \right)^{3/2} \quad (\text{Eq. S3})$$

$$\lambda_a = \frac{2\mu_a}{\rho_a v_a} \quad (\text{Eq. S4})$$

Next, we determine the terminal velocity of raindrops ( $U_t(D_d)$ ,  $\text{m s}^{-1}$ ) according to Beard (1976) for 3 regimes: small cloud droplets ( $0.5\mu\text{m} < D_d < 19\mu\text{m}$ ), large cloud droplets or small raindrops ( $19\mu\text{m} < D_d < 1.07\text{mm}$ ), and raindrops ( $1.07\text{mm} < D_d < 7\text{mm}$ ).

For  $0.5\mu\text{m} < D_d < 19\mu\text{m}$ , the terminal velocity is given from the product of the Stoke’s velocity for a rigid sphere and the slip correction or Cunningham factor (Eqs S5-S6).

$$U_t(D_d) = \frac{D_d^2(\rho_w - \rho_a)g}{18\mu_a} \times C_c(D_d) \quad (\text{Eq. S5})$$

$$C_c(D_d) = 1 + \frac{2\lambda_a}{D_d} \left( 1.257 + 0.4 \exp\left(-\frac{1.1D_d}{2\lambda_a}\right) \right) \quad (\text{Eq. S6})$$

In Eq. S5,  $\rho_w$  is the density of water  $\rho_w = 997 \text{ kg m}^{-3}$  while  $g$  is the gravitational acceleration constant ( $g = 9.8 \text{ m s}^{-2}$ ).

For  $19\mu\text{m} < D_d < 1.07\text{mm}$ , one needs to use the drag coefficient  $C_D$  as an empirical means to represent the drag force on the raindrop (Seinfeld and Pandis, 1998). Unfortunately,  $C_D$  is a function of the Reynold's number ( $R_{e,D}$ ) and thus the terminal velocity  $U_t$  and we need to determine  $U_t$  implicitly. To do this, we form the dimensionless variable  $C_D R_{e,D}^2$  (widely known as the Davies number, Eq. S7) which can then be used to determine  $R_{e,D}$ , which is finally used to determine  $U_t(D_d)$ . The algorithm according to Beard (1976) is given below.

$$X = \ln(C_D R_{e,D}^2) = \ln\left(\frac{4D_d^3 \rho_a (\rho_w - \rho_a) g}{3\mu_a^2}\right) \quad (\text{Eq. S7})$$

$$Y = \sum_{i=0}^6 a_i X^i \quad (\text{Eq. S8})$$

$$R_{e,D} = C_c(D_d) \times \exp(Y) \quad (\text{Eq. S9})$$

$$U_t(D_d) = \frac{\mu_a R_{e,D}}{\rho_a D_d} \quad (\text{Eq. S10})$$

The coefficients in Eq. S8 are:  $a_0 = -0.318657 \times 10^1$ ,  $a_1 = +0.992696 \times 10^0$ ,  $a_2 = -0.153193 \times 10^{-2}$ ,  $a_3 = -0.987059 \times 10^{-3}$ ,  $a_4 = -0.578878 \times 10^{-3}$ ,  $a_5 = +0.855176 \times 10^{-4}$ , and  $a_6 = -0.327815 \times 10^{-5}$ .

A similar approach is required for raindrops with diameters of  $1.07\text{mm} < D_d < 7\text{mm}$ . Firstly, it is necessary to construct a formula for the surface tension of the raindrop ( $\sigma_{w,a}$ ,  $\text{N m}^{-1}$ ) as a function of temperature in order to calculate the dimensionless Bond number. The surface tension decreases as temperature decreases and be described empirically using formulae for  $-40^\circ\text{C} < T_c < 0^\circ\text{C}$  from Pruppacher and Klett (2010) and  $T_c > 0^\circ\text{C}$  from Bohren and Albrecht (1998).

For  $-40^\circ\text{C} < T_c < 0^\circ\text{C}$ :

$$\sigma_{w,a} = 0.001 \times \begin{pmatrix} 75.93 + 0.115 T_c + 6.818 \times 10^{-2} T_c^2 + \\ 6.511 \times 10^{-3} T_c^3 + 2.933 \times 10^{-4} T_c^4 + \\ 6.283 \times 10^{-6} T_c^5 + 5.285 \times 10^{-8} T_c^6 \end{pmatrix} \quad (\text{Eq. S11})$$

For  $T_c > 0^\circ\text{C}$ :

$$\sigma_{w,a} = 0.2358 \times \left( \frac{374 - T_c}{647.15} \right)^{1.256} \times \left[ 1 - 0.625 \times \left( \frac{374 - T_c}{647.15} \right) \right] \quad (\text{Eq. S12})$$

It is inconvenient to have two separate formulae for one covariate. Rather, it makes more sense to fit a polynomial to the combined  $\sigma_{w,a}$  distribution. We use the function `polyfit` in the python library `numpy.polynomial.polynomial` to fit a polynomial with 6 degrees of freedom to  $\sigma_{w,a}$  for  $-40^\circ\text{C} < T_c < 100^\circ\text{C}$ , but in terms of the temperature in K where  $T_a = T_c + 273.15$ . The polynomial is then:

$$\begin{aligned} \sigma_{w,a} = & 5.1877565 \times 10^1 - 1.01222192 \times 10^0 T_a + 8.21706952 \times 10^{-3} T_a^2 \\ & - 3.54598144 \times 10^{-5} T_a^3 + 8.57833352 \times 10^{-8} T_a^4 \\ & - 1.10306055 \times 10^{-10} T_a^5 + 5.88999924 \times 10^{-14} T_a^6 \end{aligned} \quad (\text{Eq. S13})$$

Supplementary Figure S1 shows the surface tension as a function of temperature (in  $^\circ\text{C}$ ) for the combined empirical formulae (Eq. S11 and Eq. S12) and the polynomial fit (Eq. S13), along with a linear fit used in the Cloud–AeroSol Interacting Microphysics (CASIM) module (Hill *et al.*, 2015) in which  $\sigma_{w,a} = (7.61 - 0.155 T_c) \times 10^{-3}$ . It is clear that the polynomial is sufficient for our purposes, even reconciling the inconsistency between Eqs S11 and S12 at  $T_c = 0^\circ\text{C}$ .

Having determined the surface tension, we use it to define two more dimensionless variables: The Bond number ( $B_o$ , a measure of the relative importance of gravitational forces to surface tension) and  $N_p$  or the ratio of the Davies number to the Bond number to remove the diameter dependency.

$$B_o = \frac{4D_a^2(\rho_w - \rho_a)g}{3\sigma_{w,a}} \quad (\text{Eq. S14})$$

$$N_p = \frac{\sigma_{w,a}^3 \rho_a^2}{\mu_a^4(\rho_p - \rho_a)g} \quad (\text{Eq. S15})$$

The algorithm to determine  $R_{e,D}$  and  $U_t$  proceeds as follows

$$X = \ln(B_o N_p^{1/6}) \quad (\text{Eq. S16})$$

$$Y = \sum_{i=0}^5 b_i X^i \quad (\text{Eq. S17})$$

$$R_{e,D} = N_p^{1/6} \times \exp(Y) \quad (\text{Eq. S18})$$

$$U_t(D_a) = \frac{\mu_a R_{e,D}}{\rho_a D_a} \quad (\text{Eq. S19})$$

The coefficients in Eq. S17 are:  $b_0 = -0.500015 \times 10^1$ ,  $b_1 = +0.523778 \times 10^1$ ,  $b_2 = -0.204914 \times 10^1$ ,  $b_3 = +0.475294 \times 10^0$ ,  $b_4 = -0.542819 \times 10^{-1}$ , and  $b_5 = +0.238449 \times 10^{-2}$ .

In the single moment UKCA-mode impaction scavenging scheme,  $U_t(D_d)$  is parameterised using a very simple formula dependent only on the raindrop diameter  $D_d$  (Eq. S20).

$$U_t(D_d) = \begin{cases} 4055 D_d & D_d < 10^{-3}\text{m} \\ 130 D_d^{\frac{1}{2}} & D_d \geq 10^{-3}\text{m} \end{cases} \quad (\text{Eq. S20})$$

While it may be pragmatic to use a simple parameterisation (rather than the complex Beard (1976) scheme above), it is clear from Supplementary Fig. S2 that the UKCA-mode scheme overestimates  $U_t$  by orders of magnitude when  $D_d < \sim 10^{-4}\text{m}$  and does not capture the exponential decay in  $U_t$  for  $D_d > \sim 10^{-3}\text{m}$ . Given the fact that the raindrop diameters are prescribed in UKCA-mode, it may also be prudent to prescribe terminal velocities using, say  $P=800\text{mb}$  and  $T=15^\circ\text{C}$ . If a parameterisation is needed, then it may be prudent to use a 6<sup>th</sup> order polynomial of  $D_d$  with  $D_d$  in units of mm, which broadly captures both the logarithmic and linear relation between  $U_t$  and  $D_d$  for  $D_d < 7\text{mm}$ .

$$U_t(D_d) = 10^{\sum_1^6 c_i (\log_{10} D_d)^i} \quad (\text{Eq. S21})$$

Given  $D_d$  in units of mm, the coefficients in Eq. S21 are  $c_0 = 0.63357089$ ,  $c_1 = 0.82965738$ ,  $c_2 = -0.37507553$ ,  $c_3 = 0.01117498$ ,  $c_4 = -0.05815324$ ,  $c_5 = -0.04914836$ , and  $c_6 = -0.00844277$ . Figure S2 shows that the fit does a very good job of capturing both the logarithmic and linear relationship. Adding a temperature and pressure dependence may over complicate the algorithm. Note though, that in the Python script used in the manuscript, the full Beard's scheme (with a temperature dependence) and not Eq. S21 is employed. The advantage of using Eq. S21 over Beard's approach or the UKCA-mode approach is that it is unconditional and thus saves computational expense.

Following the calculation of  $U_t(D_d)$ , Reynold's number  $R_e$  is redetermined using Eq. S22, which is actually the Reynold's number based on the raindrop radius rather than diameter (compare with Eq. S10).

$$R_{e,r} = \frac{U_t(D_d)\rho_a D_d}{2\mu_a} \quad (\text{Eq. S22})$$

## S2 Raindrop size distribution

The raindrop size distribution is expressed as the number density for raindrop diameters between  $D_d$  and  $D_d + \Delta D_d$ ,  $N(D_d)$  in units of  $\text{m}^{-3} \text{m}^{-1}$ .  $N(D_d)$  is typically expressed as a function of the rainfall rate  $R$ , which is typically given in units of  $\text{kg m}^{-2} \text{s}^{-1}$ ,  $\text{mm hr}^{-1}$ , or  $\text{mm day}^{-1}$ . It is straightforward to convert between these units given that  $1 \text{ kg m}^{-2} \text{s}^{-1}$  equals  $1 \text{ mm}$  and only a temporal conversion is necessary. For this formulation  $R$  is given in units of  $\text{mm hr}^{-1}$  while  $D_d$  is expressed in m. The relationship between  $R$  and the raindrop distribution is then:

$$R = 3600 \times \int_0^\infty \frac{\rho_w \pi}{6} D_d^3 N(D_d) U_t(D_d) dD_d \quad (\text{Eq. S23})$$

Note that often  $R$  is expressed as the integral of  $\frac{\rho_w \pi}{6} D_d^3 N(D_d) U_t(D_d) dD_d$  between threshold diameters (e.g.,  $D_{\min}$  to  $D_{\max}$ ) to reflect the fact that very small raindrops do not drop, and very large raindrops eventually break into larger raindrops as they fall.

$U_t(D_d)$  has been discussed in detail. In single moment raindrop models,  $N(D_d)$  is typically parameterised using a Gamma distribution with the following probability density function.

$$N(D_d) = N_0 D_d^\mu e^{-\lambda D_d} \quad (\text{Eq. S24})$$

In Eq. S24, the parameters  $N_0$ ,  $\lambda$ , and  $\mu$  describe the intercept, slope, and shape of the Gamma distribution.  $N_0$  has units of  $\text{m}^{-3} \text{m}^{-1}$  and  $\lambda$  has units of  $\text{m}^{-1}$ . In this work, we adopt the common assumption such that  $\mu = 0$  which reduces the Gamma distribution to a simpler exponential distribution (Eq. S25).

$$N(D_d) = N_0 e^{-\lambda D_d} \quad (\text{Eq. S25})$$

Empirical parameterisations have been made between the observed  $R$  and  $N(D_d)$ . The most widely utilised  $N(D_d)$  parameterisation is from Marshall and Palmer (MP, 1948).

$$N_0 = 8 \times 10^6 \quad (\text{Eq. S26})$$

$$\lambda = 4.1 \times 10^3 R^{-0.21} \quad (\text{Eq. S27})$$

Another widely utilised parameterisation was provided by Sekhon and Srivastava (SS, 1971), which improves on MP by constraining the (positive) relationship between  $N_0$  with  $R$  using observations.

$$N_0 = 7 \times 10^6 R^{0.37} \quad (\text{Eq. S28})$$

$$\lambda = 3.8 \times 10^3 R^{-0.14} \quad (\text{Eq. S29})$$

Finally, Abel and Boutle (AB, 2012) empirically fitted  $N_0$  to  $\lambda$  using a power law. They also derived a relationship between  $\lambda$  and  $R$  by assuming  $U_t(D_d) = c_R D_d^{d_R}$ , where the constants  $c_R = 386.6$  and  $d_R = 0.67$  are from Sachidananda and Zrnica (1986). By inputting  $N(D_d)$  (Eq. S25) and  $U_t(D_d)$  into Eq. S23, and making use of the Gamma function, AB derived the following formulae for  $N_0$  and  $\lambda$ :

$$\lambda = \left( \frac{\pi \rho_w x_1 c_R \Gamma(4 + d_R + \mu)}{6 R / 3600} \right)^{\frac{1}{4 + d_R + \mu - x_2}} \approx 6.236 \times 10^3 R^{-0.4} \quad (\text{Eq. S30})$$

$$N_0 = x_1 \lambda^{x_2} \approx 4.9 \times 10^7 R^{-0.89} \quad (\text{Eq. S31})$$

AB derived  $x_1 = 0.22$  and  $x_2 = 2.2$  empirically from observations which completes the model. Note that  $\mu = 0$  in Eq. S30 under the assumption of an exponential distribution, as used in the UM.

### S3 The collision efficiency according to Slinn (1984)

The collision efficiency  $E(d_p, D_d)$  is defined as the ratio of the total number of collisions occurring between raindrops and particles to the total number of particles in an area equal to the raindrop's effective cross-sectional area, where  $d_p$  is the diameter of the collected particles (Seinfeld and Pandis, 1998). It is used in the formulation of the scavenging coefficient  $\Lambda(d_p)$  (Eqs S32-S33).

$$\frac{dn(d_p)}{dt} = -\Lambda(d_p)n(d_p) \quad (\text{Eq. S32})$$

$$\Lambda(d_p) = \int_0^\infty \frac{\pi}{4} D_d^2 U_t(D_d) E(d_p, D_d) N(D_d) dD_d \quad (\text{Eq. S33})$$

In Eq. S32,  $n(d_p)$  is the number density of aerosol particles with diameter  $d_p$  and  $\Lambda(d_p)$  is the size-resolved scavenging coefficient ( $\text{s}^{-1}$ ). Equation S33 relates  $\Lambda(d_p)$  to the integral of the collision efficiency  $E(d_p, D_d)$  over the raindrop size distribution. The next issue is to provide an explicit formulation of  $E(d_p, D_d)$  in terms of readily attainable parameters. The collection efficiency is assumed to be a linear combination of various processes that result in the collection of particles by raindrops. The classical Slinn (1984) model combines three such processes: Brownian diffusion, interception, and impaction.

The Slinn (1984) model makes use of 5 dimensionless parameters used to characterise the collected particle and the flow around the raindrop. It is empirical in nature, being based on laboratory data. Following Seinfeld and Pandis (1998) and Wang *et al.* (2010) the dimensionless parameters are:

$$R_{e,r}(D_d) = \frac{U_t(D_d)\rho_a D_d}{2\mu_a} \quad (\text{Eq. S34})$$

$$S_c(d_p) = \frac{\mu_a}{\rho_a D_{\text{diff}}(d_p)} \quad (\text{Eq. S35})$$

$$S_t(d_p, D_d) = \frac{2\tau(d_p)(U_t(D_d) - u_t(d_p))}{D_d} \quad (\text{Eq. S36})$$

$$\phi(d_p, D_d) = \frac{d_p}{D_d} \quad (\text{Eq. S37})$$

$$\omega = \frac{\mu_w}{\mu_a} \quad (\text{Eq. S38})$$

Two approximations have been made in Eqs S34-S38. Firstly, that the terminal velocity of the raindrop far exceeds the terminal velocity of the particle ( $U_t(D_d) \gg u_t(d_p)$ ), and secondly that the squared sum of the raindrop and particle diameters is effectively equal to the square of the raindrop diameter alone ( $(D_d + d_p)^2 \cong D_d^2$ ). Thus, we effectively assume that the raindrop diameter is much greater than the

particle diameter. Equations S34-S38 describe the Reynolds number with respect to radius (Eq. S34); Schmidt number (Eq. S35); Stokes number (Eq. S36); ratio of diameters (Eq. S37); and the viscosity ratio of water to air (Eq. S38). The parameters are further detailed below. With these dimensionless variables defined, Slinn (1984) then provided empirically derived formulae for the combined collision efficiency (Eqs S39-S42).

$$E_{\text{slinn}}(d_p, D_d) = E_{br}(d_p, D_d) + E_{in}(d_p, D_d) + E_{im}(d_p, D_d) \quad (\text{Eq. S39})$$

$$E_{br}(d_p, D_d) = \frac{4}{R_{e,r} S_c} \left[ 1 + 0.4 R_{e,r}^{\frac{1}{2}} S_c^{\frac{1}{3}} + 0.16 R_{e,r}^{\frac{1}{2}} S_c^{\frac{1}{2}} \right] \quad (\text{Eq. S40})$$

$$E_{in}(d_p, D_d) = 4\phi \left[ \omega^{-1} + \left( 1 + 2R_{e,r}^{\frac{1}{2}} \right) \phi \right] \quad (\text{Eq. S41})$$

$$E_{im}(d_p, D_d) = \begin{cases} \left( \frac{S_t - S_t^*}{S_t - S_t^* + 2/3} \right)^{3/2} \left( \frac{\rho_w}{\rho_p} \right)^{1/2} \times & S_t > S_t^* \\ 10^{2.905 - 3.07 \left( \log_{10} \frac{S_t}{S_t^*} \right)^{0.173} - 2.61 \times 10^{-14} R_{e,D}^{3.9}} & \\ 0 & S_t \leq S_t^* \end{cases} \quad (\text{Eq. S42})$$

The exponent in the second line in Eq. S42 is an empirical correction factor introduced by Fredericks and Saylor (2016).  $\rho_p$  is the particle density assumed to be  $1500 \text{ kg m}^{-3}$ . This is different to the density of dust used in the CLASSIC and UKCA dust schemes ( $2650 \text{ kg m}^{-3}$ ) and is more representative of, e.g., ammonium sulfate aerosol. Given the Reynold's number with respect to diameter ( $R_{e,D}$ ) determined using Beard's (1976) approach (Section S1 in the Supplement), the critical Stokes number  $S_t^*$  is then defined as:

$$S_t^*(D_d) = \frac{1.2 + \frac{1}{12} \ln(1 + R_{e,D})}{1 + \ln(1 + R_{e,D})} \quad (\text{Eq. S43})$$

A few variables have been introduced in Eqs S34-S43 and need to be defined. Namely, the characteristic relaxation time of particles ( $\tau$ , s), the particle Brownian diffusion coefficient ( $D_{\text{diff}}$ ,  $\text{m}^2 \text{ s}^{-1}$ ), the viscosity of water ( $\mu_w$ ,  $\text{kg m}^{-1} \text{ s}^{-1}$ ), and the density of water ( $\rho_w = 997 \text{ kg m}^{-3}$ ). Seinfeld and Pandis (1998) provide formulae for  $\tau$  and  $D_{\text{diff}}$  (Eqs S44-S46).

$$\tau(d_p) = \frac{(\rho_p - \rho_a) d_p^2 C_c(d_p)}{18\mu_a} \quad (\text{Eq. S44})$$

$$D_{\text{diff}}(d_p) = \frac{k_B T_a C_c(d_p)}{3\pi\mu_a d_p} \quad (\text{Eq. S45})$$

$$C_c(d_p) = 1 + \frac{2\lambda_a}{d_p} \left( 1.257 + 0.4 \exp \left( -\frac{1.1d_p}{2\lambda_a} \right) \right) \quad (\text{Eq. S46})$$

Dehaoui *et al.* (2015) provide a power law for  $\mu_w$  in terms of temperature valid from super-cooled water up to the boiling point or  $239.15 \text{ K} \leq T_a \leq 373.15 \text{ K}$  (Eq. S47).



$$\mu_w = 1.3788 \times 10^{-4} \times \left( \frac{T_a}{225.66} - 1 \right)^{-1.6438} \quad (\text{Eq. S47})$$

## S4 Thermophoresis and diffusiophoresis effects

A number of studies have suggested that  $E_{\text{slinn}}(D_d, d_p)$  significantly underestimates the collision efficiency, particularly for accumulation sized particles ( $0.1 \mu\text{m} < d_p < 1 \mu\text{m}$ ), by missing out key processes that affect collision. Various processes have been highlighted as having an impact upon collision, such as thermophoresis, diffusiophoresis, and electric charge. Davenport and Peters (1978), Andronache *et al.* (2006), Wang *et al.* (2010), and various others have provided formulae for these missing effects.

For thermophoresis ( $E_{Th}(d_p, D_d)$ ) and diffusiophoresis ( $E_{Df}(D_d)$ ), the following are applicable:

$$E_{th}(d_p, D_d) = \frac{4\alpha_{th} \left( 2 + 0.6 R_{e,r}^{\frac{1}{2}} P_r^{\frac{1}{3}} \right) (T_a - T_s)}{U_t(D_d) D_d} \quad (\text{Eq. S48})$$

$$E_{df}(D_d) = \frac{4\beta_{dph} \left( 2 + 0.6 R_{e,r}^{\frac{1}{2}} S_{cw}^{\frac{1}{3}} \right) \left( \frac{p_s^0}{T_s} - \frac{p_a^0 RH}{T_a} \right)}{U_t(D_d) D_d} \quad (\text{Eq. S49})$$

$$\alpha_{th} = \frac{2 \left( k_a + \frac{5\lambda_a}{D_d k_p} \right) k_a c_c(d_p)}{5P_a \left( 1 + \frac{6\lambda_a}{D_d} \right) \left( 2k_a + k_p + \frac{10\lambda_a}{D_d k_p} \right)} \quad (\text{Eq. S50})$$

$$P_r = \frac{c_p \mu_a}{k_a} \quad (\text{Eq. S51})$$

$$\beta_{dph} = \frac{T_a D_{\text{diffwater}}}{P_a} \left( \frac{M_w}{M_a} \right)^{\frac{1}{2}} \quad (\text{Eq. S52})$$

$$S_{cw} = \frac{\mu_a}{\rho_a D_{\text{diffwater}}} \quad (\text{Eq. S53})$$

The algorithm is rather involved and requires expressions for the new parameters: the thermal conductivity of air ( $k_a$ ,  $\text{J m}^{-1} \text{s}^{-1} \text{K}^{-1}$ ), the thermal conductivity of the particle ( $k_p$ ,  $\text{J m}^{-1} \text{s}^{-1} \text{K}^{-1}$ ), the water vapour diffusivity in air ( $D_{\text{diffwater}}$ ,  $\text{m}^2 \text{s}^{-1}$ ), the raindrop surface temperature ( $T_s$ , K), and the saturation vapour pressure of water ( $p_a^0$  and  $p_s^0$  at temperature  $T_a$  and  $T_s$  respectively, Pa). In terms of constants, the molar mass of water is  $M_w = 0.01802$ , the molar mass of dry air is  $M_a = 0.02896 \text{ kg mol}^{-1}$ , and the specific heat capacity of air is  $c_p = 1003.5 \text{ J kg}^{-1} \text{K}^{-1}$ .  $RH$  in Eq. S49 is the relative humidity (%), assumed to be 80 % in this study.

From Pruppacher and Klett (2010), we have the following formulae for  $k_a$  and  $D_{\text{diffwater}}$ , where for the latter  $T_0 = 273.15$  K and  $P_0 = 101,325$  Pa.

$$k_a = 418.4 \times (1.04645 + 0.017 T_a) \times 10^{-5} \quad (\text{Eq. S54})$$

$$D_{\text{diffwater}} = 0.211 \times 10^{-4} \times \left(\frac{T_a}{T_0}\right)^{1.94} \left(\frac{P_0}{P_a}\right) \quad (\text{Eq. S55})$$

The particulate thermal conductivity ( $k_p$ ) depends on the aerosol in question. Ladino *et al.* (2011) use a value of 0.419, which is similar to representative values for ammonium sulphate, ammonium nitrate, and soot at 0 °C (0.53). Whereas sea-salt has  $k_p = 6.7$  and calcite (mineral dust) is  $k_p \approx 3$ . For this simple investigation, we assume  $k_p = 0.5$  following the logic that this scheme may well be used for all UKCA-mode aerosol in future.

For the surface temperature of raindrops ( $T_s$ ), a good assumption is to use the wet-bulb temperature which is always less than the ambient dry-bulb temperature ( $T_a$ ). For simplicity though, we assume a constant  $T_a - T_s$  increment, such that  $T_s = T_a - 5^\circ\text{C}$  as in Davenport and Peters (1978), or  $T_s = T_a - 3^\circ\text{C}$  as in Wang *et al.* (2010). We choose  $T_s = T_a - 3^\circ\text{C}$ .

We use the saturation vapour pressure formula from Seinfeld and Pandis (1998), where temperature is in °C and may refer to the air temperature ( $T_a$ ) or the raindrop temperature ( $T_s$ ). The coefficients are  $a_0 = 6.107799961$ ,  $a_1 = 4.436518521 \times 10^{-1}$ ,  $a_2 = 1.428945805 \times 10^{-2}$ ,  $a_3 = 2.650648471 \times 10^{-4}$ ,  $a_4 = 3.031240396 \times 10^{-6}$ ,  $a_5 = 2.034080948 \times 10^{-8}$ , and  $a_6 = 6.136820929 \times 10^{-11}$ .

$$p^0 = 100 \times (a_0 + a_1 T + a_2 T^2 + a_3 T^3 + a_4 T^4 + a_5 T^5 + a_6 T^6) \quad (\text{Eq. S56})$$

## S5 Charged particles

Particles and raindrops may attract each other if their charges are of opposite sign, an effect which should be included in the collision efficiency. Andronache *et al.* (2006) use the following relation for the collision efficiency due to charge.

$$E_{es}(d_p, D_d) = \frac{16KQ_d q_p C_c(d_p)}{3\pi\mu_a U_t(D_d) D_d^2 d_p} \quad (\text{Eq. S57})$$

$$Q_d = a\alpha D_d^2 \quad (\text{Eq. S58})$$

$$q_p = a\alpha d_p^2 \quad (\text{Eq. S59})$$

In Eq. S57,  $K = 9 \times 10^9$  N m<sup>2</sup> C<sup>-2</sup>, while in Eqs S58-S59  $a = 0.83 \times 10^{-6}$ .  $\alpha$  is an empirically derived parameter that ranges from 0 to 7 C m<sup>-2</sup> for neutral to highly charged particles respectively. Wang *et al.* (2010) use  $\alpha = 2$  based on standard tropospheric conditions.

## References

- Abel, S. J. and Boutle, I. A.: An improved representation of the raindrop size distribution for single-moment microphysics schemes, *Q. J. Roy. Meteorol. Soc.*, 138, 2151-2162, <https://doi.org/10.1002/qj.1949>, 2012.
- Adler, R. F., Huffman, G. J., Chang, A., Ferraro, R., Xie, P., Janowiak, J., Rudolf, B., Schneider, U., Curtis, S., Bolvin, D., Gruber, A., Susskind, J., and Arkin, P.: The Version 2 Global Precipitation Climatology Project (GPCP) Monthly Precipitation Analysis (1979-Present), *J. Hydrometeor.*, 4, 1147-1167, 2003.
- Andronache, C., Gr nholm, T., Laakso, L., Phillips, V., and Ven l inen, A.: Scavenging of ultrafine particles by rainfall at a boreal site: observations and model estimations, *Atmos. Chem. Phys.*, 6, 4739-4754, doi:10.5194/acp-6-4739-2006, 2006.
- Beard, K. V.: Terminal velocity and shape of cloud and precipitation drops aloft, *J. Atmos. Sci.*, 33, 851-864, 1976.
- Bohren, C.F., and Albrecht, B.A.: *Atmospheric Thermodynamics*. New York: Oxford University Press, 402 p., 1998.
- Davenport, H. M. and Peters, L. K.: Field studies of atmospheric particulate concentration changes during precipitation, *Atmos. Environ.*, 12, 997-1008, 1978.
- Dehaoui, A., Issenmann, B., and Caupin, F.: Viscosity of deeply supercooled water and its coupling to molecular diffusion, *P. Natl. Acad. Sci. USA*, 112, 12020-12025, doi:10.1073/pnas.1508996112, 2015.
- Fredericks, S., and Saylor, J. R.: Parametric investigation of two aerosol scavenging models in the inertial regime, *J. Aerosol Sci.*, 101, 34-42, <http://dx.doi.org/10.1016/j.jaerosci.2016.07.011>, 2016.
- Hill, A. A., Shipway, B. J., and Boutle, I. A.: How sensitive are aerosol-precipitation interactions to the warm rain representation?, *J. Adv. Model. Earth Syst.*, 7, 987–1004, doi:10.1002/2014MS000422., 2015.
- Holben, B. N., Eck, T. F., Slutsker, I., Tanre, D., Buis, J. P., Setzer, A., et al.: AERONET – A federated instrument network and data archive for aerosol characterization, *Remote Sens. Environ.*, 66(1), 1-16, 1998.
- Huneus, N., Schulz, M., Balkanski, Y., Griesfeller, J., Prospero, J., Kinne, S., Bauer, S., Boucher, O., Chin, M., Dentener, F., Diehl, T., Easter, R., Fillmore, D., Ghan, S., Ginoux, P., Grini, A., Horowitz, L., Koch, D., Krol, M. C., Landing, W., Liu, X., Mahowald, N., Miller, R., Morcrette, J.-J., Myhre, G., Penner, J., Perlwitz, J., Stier, P., Takemura, T., and Zender, C. S.: Global dust model intercomparison

in AeroCom phase I, *Atmos. Chem. Phys.*, 11, 7781–7816, <https://doi.org/10.5194/acp-11-7781-2011>, 2011.

Kok, J. F., Adebisi, A. A., Albani, S., Balkanski, Y., Checa-Garcia, R., Chin, M., Colarco, P. R., Hamilton, D. S., Huang, Y., Ito, A., Klose, M., Leung, D. M., Li, L., Mahowald, N. M., Miller, R. L., Obiso, V., Pérez García-Pando, C., Rocha-Lima, A., Wan, J. S., and Whicker, C. A.: Improved representation of the global dust cycle using observational constraints on dust properties and abundance, *Atmos. Chem. Phys.*, 21, 8127–8167, <https://doi.org/10.5194/acp-21-8127-2021>, 2021.

Ladino, L., Stetzer, O., Hattendorf, B., Günther, D., Croft, B., and Lohmann, U.: Experimental study of collection efficiencies between sub-micrometer aerosols and cloud droplets, *J. Atmos. Sci.*, 68, 1853–1864, doi:10.1175/JAS-D-11-012.1, 2011.

List, R.: *Smithsonian Meteorological Tables*, 6th rev. edn., 4th reprint, Washington, DC, 1968.

Marshall, J. S. and Palmer, W.: The distribution of raindrops with size, *J. Meteorol.*, 5, 165–166, 1948.

Prospero, J. M. and Nees, R. T.: Impact of the North African drought and El Niño on mineral dust in the Barbados trade winds, *Nature*, 320, 735–738, <https://doi.org/10.1038/320735a0>, 1986.

Pruppacher H. R. and Klett, J. D.: *Microphysics of clouds and precipitation*; 2nd Edn., Springer, Dordrecht, 954 pp., ISBN 978-0-7923-4211-3, 2010.

Sachidananda, M. and Zrnic, D. S.: Differential propagation phase shift and rainfall rate estimation, *Radio Sci.*, 21, 235–247, 1986.

Seinfeld, J. H. and Pandis, S. N.: *Atmospheric Chemistry and Physics*, Wiley, New York, USA, 1998.

Sekhon, R. and Srivastava, R.: Doppler observations of drop size distributions in a thunderstorm, *J. Atmos. Sci.*, 28, 983–994, 1971.

Slinn, W. G. N.: *Precipitation Scavenging in Atmospheric Science and Power Production*, CH. 11, edited by: Randerson, D., Tech. Inf. Cent., Off. of Sci. and Techn. Inf., Dep. of Energy, Washington DC, USA, 466–532, 1984.

Wang, X., Zhang, L., and Moran, M. D.: Uncertainty assessment of current size-resolved parameterizations for below-cloud particle scavenging by rain, *Atmos. Chem. Phys.*, 10, 5685–5705, doi:10.5194/acp-10-5685-2010, 2010.

Wang, X., Zhang, L., and Moran, M. D.: Development of a new semi-empirical parameterization for below-cloud scavenging of size-resolved aerosol particles by both rain and snow, *Geosci. Model Dev.*, 7, 799–819, doi:10.5194/gmd-7-799-2014, 2014.

| Symbol                 | Description                                   | Units                                         | Value                    | Equation(s)                                |
|------------------------|-----------------------------------------------|-----------------------------------------------|--------------------------|--------------------------------------------|
| $a$                    | Constant in formulation of $E_{es}$           | -                                             | $0.83 \times 10^{-6}$    | -                                          |
| $B_o$                  | Bond number                                   | -                                             | Derived                  | S14                                        |
| $c_p$                  | Specific heat capacity of air                 | $\text{J kg}^{-1} \text{K}^{-1}$              | 1003.5                   | -                                          |
| $C_c$                  | Cunningham correction factor                  | -                                             | Derived                  | S6, S46                                    |
| $d_p$                  | Aerosol diameter                              | m                                             | Variable                 | -                                          |
| $D_d$                  | Raindrop diameter                             | m                                             | Variable                 | -                                          |
| $D_{\text{diff}}$      | Brownian diffusion coefficient                | $\text{m}^2 \text{s}^{-1}$                    | Derived                  | S45                                        |
| $D_{\text{diffwater}}$ | Water vapour diffusivity in air               | $\text{m}^2 \text{s}^{-1}$                    | Derived                  | S55                                        |
| $E$                    | Collision efficiency                          | -                                             | Derived                  | S39- S41, S48, S49, S57<br>Eq. 12 in paper |
| $E_{\text{slinn}}$     | Collision efficiency proposed by Slinn (1984) | -                                             | Derived                  | S39                                        |
| $E_{br}$               | Collision efficiency due to Brownian motion   | -                                             | Derived                  | S40                                        |
| $E_{in}$               | Collision efficiency due to interception      | -                                             | Derived                  | S41                                        |
| $E_{im}$               | Collision efficiency due to impaction         | -                                             | Derived                  | S42                                        |
| $E_{th}$               | Collision efficiency due to thermophoresis    | -                                             | Derived                  | S48                                        |
| $E_{df}$               | Collision efficiency due to diffusiophoresis  | -                                             | Derived                  | S48                                        |
| $E_{es}$               | Collision efficiency due to electric charge   | -                                             | Derived                  | S57                                        |
| $E_{rc}$               | Collision efficiency due to rear-capture      | -                                             | Derived                  | Eq. 12 in paper                            |
| $g$                    | Gravitational acceleration                    | $\text{m s}^{-2}$                             | 9.8                      | -                                          |
| $k_B$                  | Boltzmann constant                            | $\text{J K}^{-1}$                             | $1.3804 \times 10^{-23}$ | -                                          |
| $k_a$                  | Thermal conductivity of air                   | $\text{J m}^{-1} \text{s}^{-1} \text{K}^{-1}$ | Derived                  | S54                                        |
| $k_p$                  | Thermal conductivity of the particle          | $\text{J m}^{-1} \text{s}^{-1} \text{K}^{-1}$ | 0.5                      | -                                          |
| $K$                    | Constant in formulation of $E_{es}$           | $\text{N m}^2 \text{C}^{-2}$                  | $9 \times 10^9$          | -                                          |
| $m_a$                  | Molecular mass of dry air                     | kg                                            | $4.78 \times 10^{-26}$   | -                                          |
| $M_w$                  | Molar mass of water                           | $\text{kg mol}^{-1}$                          | 0.01802                  | -                                          |

|               |                                                         |                                             |         |                   |
|---------------|---------------------------------------------------------|---------------------------------------------|---------|-------------------|
| $M_a$         | Molar mass of dry air                                   | $\text{kg mol}^{-1}$                        | 0.02896 | -                 |
| $n$           | Number density of aerosol particles                     | $\text{m}^{-3} \text{m}^{-1}$               | Derived | Lognormal PDF     |
| $N$           | Number density of raindrops                             | $\text{m}^{-3} \text{m}^{-1}$               | Derived | S24               |
| $N_0$         | Intercept of raindrop distribution                      | $\text{m}^{-3} \text{m}^{-1}$               | Derived | S26, S28, S31     |
| $N_p$         | Ratio of Davies to Bond Number                          | -                                           | Derived | S15               |
| $p_a^0$       | Saturation vapor pressure of water at temperature $T_a$ | Pa                                          | Derived | S56               |
| $p_s^0$       | Saturation vapor pressure of water at temperature $T_s$ | Pa                                          | Derived | S56               |
| $P_a$         | Air pressure                                            | Pa                                          | 101,325 | -                 |
| $P_r$         | Prandtl number                                          | -                                           | Derived | S51               |
| $q_p$         | Mean charge of a particle                               | C                                           | Derived | S59               |
| $Q_d$         | Mean charge of a rain drop                              | C                                           | Derived | S58               |
| $R$           | Rainfall rate                                           | $\text{mm hr}^{-1}$                         | Derived | S23               |
| $R_a$         | Specific gas constant                                   | $\text{J kg}^{-1} \text{K}^{-1}$            | 287.05  | -                 |
| $R_{e,r}$     | Reynolds number according to radius                     | -                                           | Derived | S22, S34          |
| $R_{e,D}$     | Reynolds number according to diameter                   | -                                           | Derived | S9, S18           |
| $RH$          | Relative Humidity                                       | %                                           | 80      | -                 |
| $S$           | Sutherland constant                                     | K                                           | 120     | -                 |
| $S_c$         | Schmidt number                                          | -                                           | Derived | S35               |
| $S_{cw}$      | Schmidt number for water in air                         | -                                           | Derived | S53               |
| $S_t$         | Stokes number                                           | -                                           | Derived | S36               |
| $S_t^*$       | Critical Stokes number                                  | -                                           | Derived | S43               |
| $T_a$         | Air temperature                                         | K                                           | 293.15  | -                 |
| $T_c$         | Air temperature in Celsius                              | $^{\circ}\text{C}$                          | 20      | -                 |
| $T_s$         | Raindrop surface temperature                            | K                                           | Derived | $T_a - 3$         |
| $T_0$         | Sutherland constant                                     | K                                           | 296.166 | -                 |
| $U_t$         | Terminal velocity of particle / raindrop                | $\text{m s}^{-1}$                           | Derived | S5, S10, S19, S20 |
| $\alpha$      | Parameter in formulation of $E_{es}$                    | $\text{C m}^{-2}$                           | 2       | -                 |
| $\alpha_{th}$ | Variable in formulation of $E_{th}$                     | $\text{m}^2 \text{s}^{-1} \text{K}^{-1}$    | Derived | S50               |
| $\beta_{dph}$ | Variable in formulation of $E_{df}$                     | $\text{m}^2 \text{s}^{-1} \text{K Pa}^{-1}$ | Derived | S52               |
| $\lambda$     | Slope of raindrop distribution                          | $\text{m}^{-1}$                             | Derived | S29               |

|                |                                 |                                    |                       |               |
|----------------|---------------------------------|------------------------------------|-----------------------|---------------|
| $\lambda_a$    | Mean free path of air molecules | m                                  | Derived               | S4            |
| $\Lambda$      | Scavenging coefficient          | s <sup>-1</sup>                    | Derived               | S33           |
| $\mu$          | Shape of raindrop distribution  | -                                  | 0                     | -             |
| $\mu_a$        | Dynamic viscosity of air        | kg m <sup>-1</sup> s <sup>-1</sup> | Derived               | S3            |
| $\mu_w$        | Viscosity of water              | kg m <sup>-1</sup> s <sup>-1</sup> | Derived               | S47           |
| $\mu_0$        | Sutherland constant             | kg m <sup>-1</sup> s <sup>-1</sup> | $1.83 \times 10^{-5}$ | -             |
| $v_a$          | Mean speed of air molecules     | m s <sup>-1</sup>                  | Derived               | S2            |
| $\rho_a$       | Air density                     | kg m <sup>-3</sup>                 | Derived               | S1            |
| $\rho_p$       | Aerosol density                 | kg m <sup>-3</sup>                 | 1500                  | -             |
| $\rho_w$       | Density of water                | kg m <sup>-3</sup>                 | 997                   | -             |
| $\sigma_{w,a}$ | Surface tension of water        | N m <sup>-1</sup>                  | Derived               | S11, S12, S13 |
| $\tau$         | Relaxation time of particles    | s                                  | Derived               | S44           |
| $\phi$         | Diameter ratio                  | -                                  | Derived               | S37           |
| $\omega$       | Ratio of water to air viscosity | -                                  | Derived               | S38           |

**Table S1. All variables and their values used in BCS models (Sections S1-S5)**

| Constants in the Wang <i>et al.</i> (2014) $\Lambda_{\text{rain}}$ parameterization |                             |                            |                            |                            |                          |                         |                             |
|-------------------------------------------------------------------------------------|-----------------------------|----------------------------|----------------------------|----------------------------|--------------------------|-------------------------|-----------------------------|
|                                                                                     | $i = 0$                     | $i = 1$                    | $i = 2$                    | $i = 3$                    | $i = 4$                  | $i = 5$                 | $i = 6$                     |
| $a_i$                                                                               | -6.2609<br>$\times 10^0$    | 6.8200<br>$\times 10^{-1}$ | 8.6760<br>$\times 10^{-1}$ | 1.2820<br>$\times 10^{-1}$ |                          |                         |                             |
| $b_i$                                                                               | -1.4707<br>$\times 10^1$    | 5.1043<br>$\times 10^1$    | -9.7306<br>$\times 10^1$   | 9.7946<br>$\times 10^1$    | -5.3923<br>$\times 10^1$ | 1.5311<br>$\times 10^1$ | -1.7510<br>$\times 10^0$    |
| $c_i$                                                                               | 7.2300<br>$\times 10^{-1}$  | 3.0300<br>$\times 10^{-2}$ |                            |                            |                          |                         |                             |
| $d_i$                                                                               | -6.4920<br>$\times 10^{-1}$ | 9.3483<br>$\times 10^0$    | -2.1929<br>$\times 10^1$   | 2.5317<br>$\times 10^1$    | -1.5395<br>$\times 10^1$ | 4.7242<br>$\times 10^0$ | -5.7660<br>$\times 10^{-1}$ |

**Table S2. Constants in the Wang *et al.* (2014)  $\Lambda_{\text{rain}}$  parameterization**



| Region Name          | Region Coordinates  | Region ID | DJF   | MAM   | JJA   | SON   |
|----------------------|---------------------|-----------|-------|-------|-------|-------|
| Mid-Atlantic         | [20-50W, 4-40N]     | Atl       | 0.064 | 0.106 | 0.143 | 0.084 |
| African west coast   | [5-20W, 10-34N]     | NAf       | 0.18  | 0.25  | 0.365 | 0.233 |
| Northern Africa      | [5W-30E, 26-40N]    | NAf       | 0.118 | 0.219 | 0.207 | 0.151 |
| Mali/Niger           | [5W-10E, 10-26N]    | NAf       | 0.257 | 0.441 | 0.462 | 0.277 |
| Bodele/Sudan         | [10-40E, 10-26N]    | NAf       | 0.191 | 0.339 | 0.31  | 0.212 |
| Northern Middle East | [30-50E, 26-40N]    | MEast     | 0.112 | 0.223 | 0.164 | 0.113 |
| Southern Middle East | [40-67.5E, 0-26N]   | MEast     | 0.123 | 0.204 | 0.33  | 0.15  |
| Kyzyl Kum            | [50-67.5E, 26-50N]  | Asia      | 0.115 | 0.176 | 0.154 | 0.101 |
| Thar                 | [67.5-75E, 20-50N]  | Asia      | 0.13  | 0.238 | 0.319 | 0.135 |
| Taklamakan           | [75-92.5E, 30-50N]  | Asia      | 0.119 | 0.275 | 0.171 | 0.104 |
| Gobi                 | [92.5-115E, 36-50N] | Asia      | 0.093 | 0.192 | 0.102 | 0.047 |
| North America        | [80-130W, 20-45N]   | NAm       | 0.01  | 0.029 | 0.028 | 0.012 |
| South America        | [55-80W, 0-55S]     | SAm       | 0.019 | 0.013 | 0.01  | 0.016 |
| Southern Africa      | [10-40E, 10-35S]    | SAf       | 0.016 | 0.011 | 0.013 | 0.016 |
| Australia            | [110-160E, 10-40S]  | Aus       | 0.025 | 0.013 | 0.01  | 0.023 |

**Table S3. Regional and seasonal 550nm dust optical depths from Kok et al. (2021) using observationally constrained model simulations of the dust lifecycle. The ‘Region ID’ column refers to the regions adopted in Figs 7, 8, 9, 11, and S11 (d-f) used to group the points spatially, where Atl = Atlantic Ocean, NAf = North Africa, MEast = Middle East, NAm = North America, SAm = South America, SAf = South Africa and Aus = Australia.**

| Station                  | Region ID | Latitude | Longitude | 440 nm aerosol optical depth (AOD) |         |         |         |
|--------------------------|-----------|----------|-----------|------------------------------------|---------|---------|---------|
|                          |           |          |           | Dec-Feb                            | Mar-May | Jun-Aug | Sep-Nov |
| Agoufou Mali             | ANet      | 15.3454N | 1.47912W  | 0.3232                             | 0.6905  | 0.6840  | 0.4195  |
| Ouagadougou Burkina Faso | ANet      | 12.2N    | 1.4W      | 0.4650                             | 0.7370  | 0.4737  | 0.4576  |
| Cape Verde               | ANet      | 16.7325N | 22.9355W  | 0.2732                             | 0.2995  | 0.5246  | 0.3834  |
| Banizoumbou Niger        | ANet      | 13.5412N | 2.66475E  | 0.3789                             | 0.7418  | 0.5549  | 0.4196  |
| Dakar Senegal            | ANet      | 14.3942N | 16.9586W  | 0.3354                             | 0.5098  | 0.6018  | 0.4061  |
| Cinzana Mali             | ANet      | 13.2784N | 5.93387W  | 0.3547                             | 0.6924  | 0.5338  | 0.3504  |
| Tamanrasset Algeria      | ANet      | 22.79N   | 5.53E     | 0.0708                             | 0.2617  | 0.4600  | 0.2269  |
| Zinder airport Niger     | ANet      | 13.7767N | 8.99023E  | 0.4571                             | 0.6803  | 0.5437  | 0.4350  |

**Table S4. AERONET 440 nm seasonal aerosol optical depth in 8 dusty regions (Holben *et al.*, 1998). The ‘Region ID’ column refers to the regions adopted in Figs 7, 8, 9, 11, and S11 (d-f) used to group the points spatially, where ANet = AERONET**

| Station                          | Region ID | Latitude | Longitude | Near surface dust concentration ( $\mu\text{g m}^{-3}$ ) |         |         |         |
|----------------------------------|-----------|----------|-----------|----------------------------------------------------------|---------|---------|---------|
|                                  |           |          |           | Dec-Feb                                                  | Mar-May | Jun-Aug | Sep-Nov |
| Cape Grim<br>Tasmania            | Aus       | 40.68S   | 144.68E   | 2.4780                                                   | 1.7105  | 0.6190  | 1.2105  |
| Marsh<br>King George Island      | SOc       | 62.18S   | 58.3W     | 0.9245                                                   | 0.7345  | 0.2745  | 0.3245  |
| Mawson<br>Antarctica             | SOc       | 67.6S    | 62.5E     | 0.2210                                                   | 0.0325  | 0.0340  | 0.1295  |
| Palmer Station<br>Antarctica     | SOc       | 64.77S   | 64.05W    | 0.1050                                                   | 0.4805  | 0.6995  | 0.2085  |
| Funafuti<br>Tuvalu               | Pac       | 8.5S     | 179.2W    | 0.0865                                                   | 0.0795  | 0.1845  | 0.3785  |
| Menen Point<br>Nauru             | Pac       | 0.53S    | 166.95E   | 0.0705                                                   | 0.2715  | 0.0585  | 0.0725  |
| Norfolk Island                   | Aus       | 29.08S   | 167.98E   | 0.7620                                                   | 0.5960  | 0.1075  | 2.3480  |
| American Samoa                   | Pac       | 14.25S   | 170.58W   | 0.1880                                                   | 0.1610  | 0.1290  | 0.0770  |
| Midway Island                    | Pac       | 28.22N   | 177.35W   | 0.2475                                                   | 1.7720  | 0.3055  | 0.3720  |
| Oahu Hawaii                      | Pac       | 21.33N   | 157.7W    | 0.5230                                                   | 1.3455  | 0.3650  | 0.2495  |
| Cheju – Korea                    | Asia      | 33.52N   | 126.48E   | 8.4510                                                   | 25.4015 | 6.0175  | 11.5470 |
| Fanning Island                   | Pac       | 3.92N    | 159.33W   | 0.0380                                                   | 0.2675  | 0.0405  | 0.0385  |
| Enewetak Atoll                   | Pac       | 11.33N   | 162.33E   | 0.1375                                                   | 0.4390  | 0.1800  | 0.0885  |
| Ragged Point<br>Barbados         | WAtl      | 13.17N   | 59.43W    | 4.9480                                                   | 15.1195 | 30.5450 | 18.2140 |
| Bermuda West and<br>East         | WAtl      | 32.27N   | 64.87W    | 0.3425                                                   | 1.2325  | 7.1990  | 3.0560  |
| Mace Head<br>Ireland             | Eur       | 53.32N   | 9.85W     | 0.9940                                                   | 1.2820  | 1.0205  | 0.7625  |
| University of Miami<br>– Florida | WAtl      | 25.75N   | 80.25W    | 1.2365                                                   | 1.7260  | 14.2730 | 2.6590  |
| Izana Tenerife<br>(alt=2360 m)   | EAtl      | 28.3N    | 16.5W     | 8.3015                                                   | 39.8525 | 33.9970 | 31.1735 |

**Table S5. Seasonal near surface dust concentrations from the University of Miami Oceanic Aerosols Network (U-MIAMI) (Prospero and Nees, 1986). The ‘Region ID’ column refers to the regions adopted in Figs 7, 8, 9, 11, and S11 (g-i) used to group the points spatially, where Aus = Australia, SOc = Southern Ocean, Pac = Pacific Ocean, WAtl = West Atlantic, Eur = Europe, and EAtl = East Atlantic.**

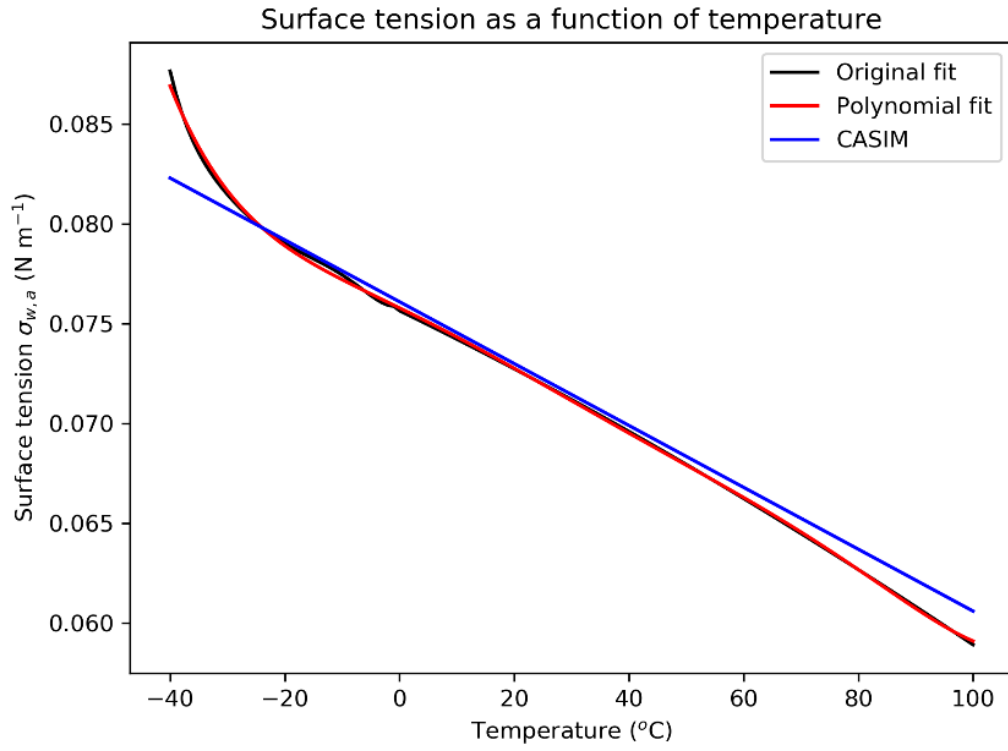

**Figure S1.** Surface tension  $\sigma_{w,a}$  as a function of temperature  $T_c$ . Cloud AeroSol Interaction Microphysics (CASIM) is a new cloud microphysics model at the Met Office (Hill *et al.*, 2015) and is shown for reference

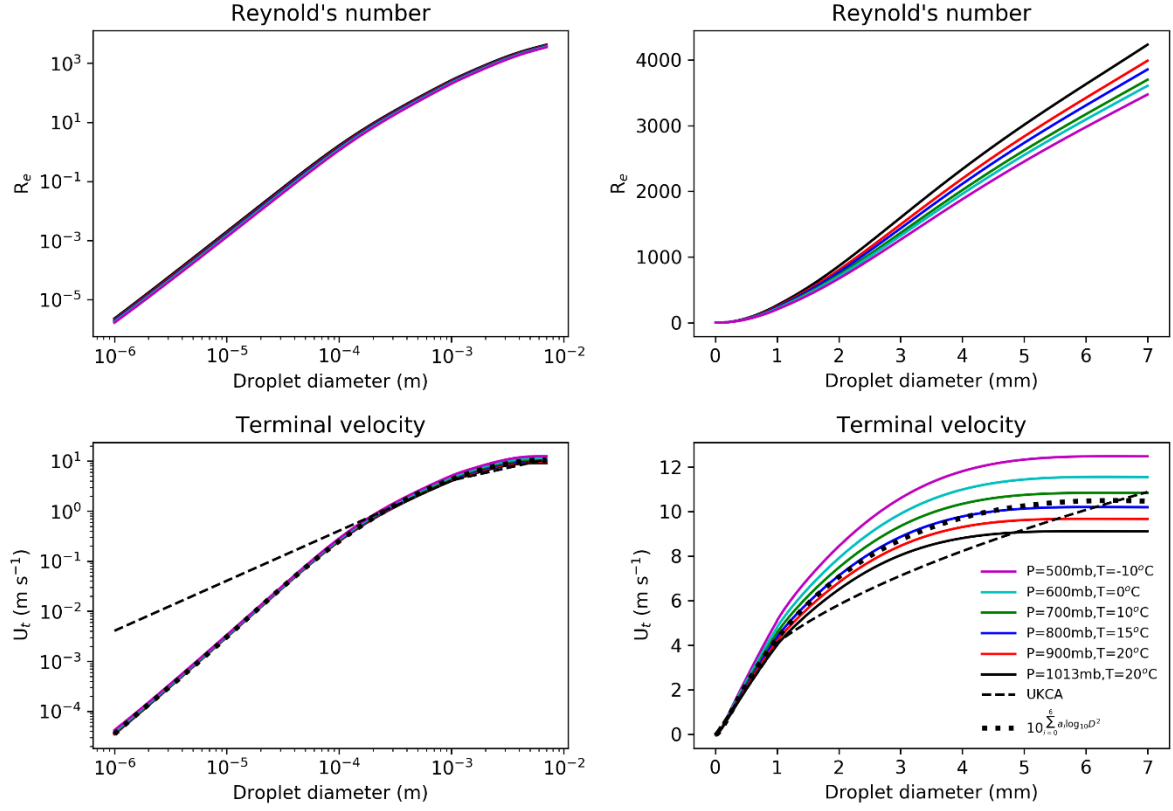

**Figure S2.** Reynold's number ( $R_{e,D}$ ) and terminal velocity ( $U_t$ ) as a function of raindrop diameter ( $D_d$ ) for various standard atmospheric conditions using the Beard (1976) scheme alongside  $U_t$  as parameterised in UKCA and the parameterisation given in Eq. S21.

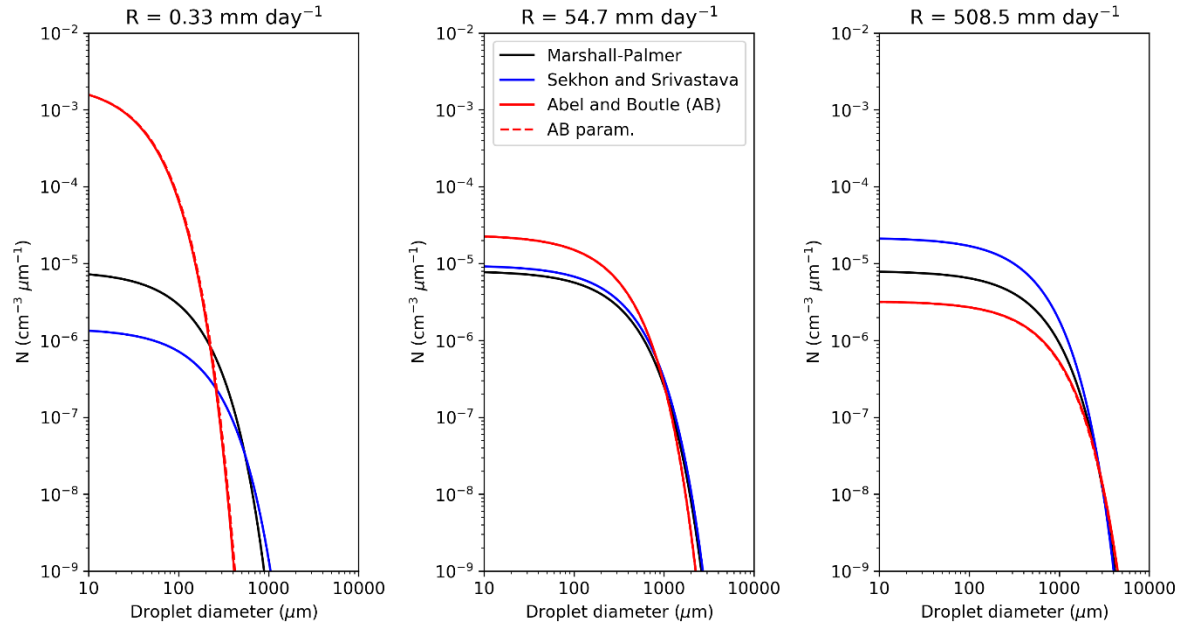

**Figure S3. The raindrop number distribution for various rainfall rates ( $R$ ) and 3 different parameterisations assuming an exponential distribution**

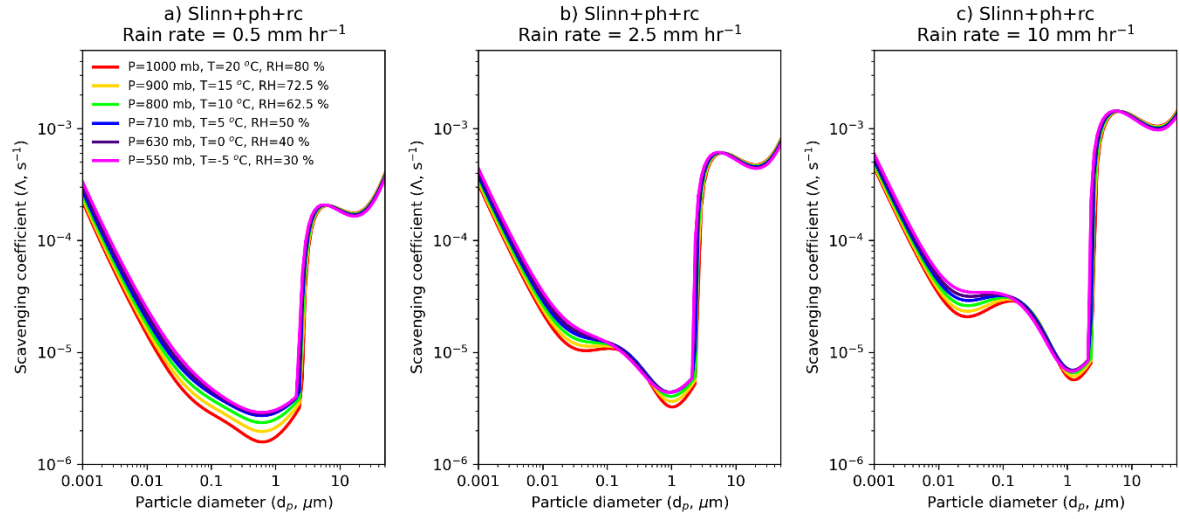

**Figure S4.** BCS scavenging coefficient for the *Slinn+ph+rc* model as a function of aerosol diameter for various atmospheric profiles representative of 1 km altitude increments from the surface to 5 km

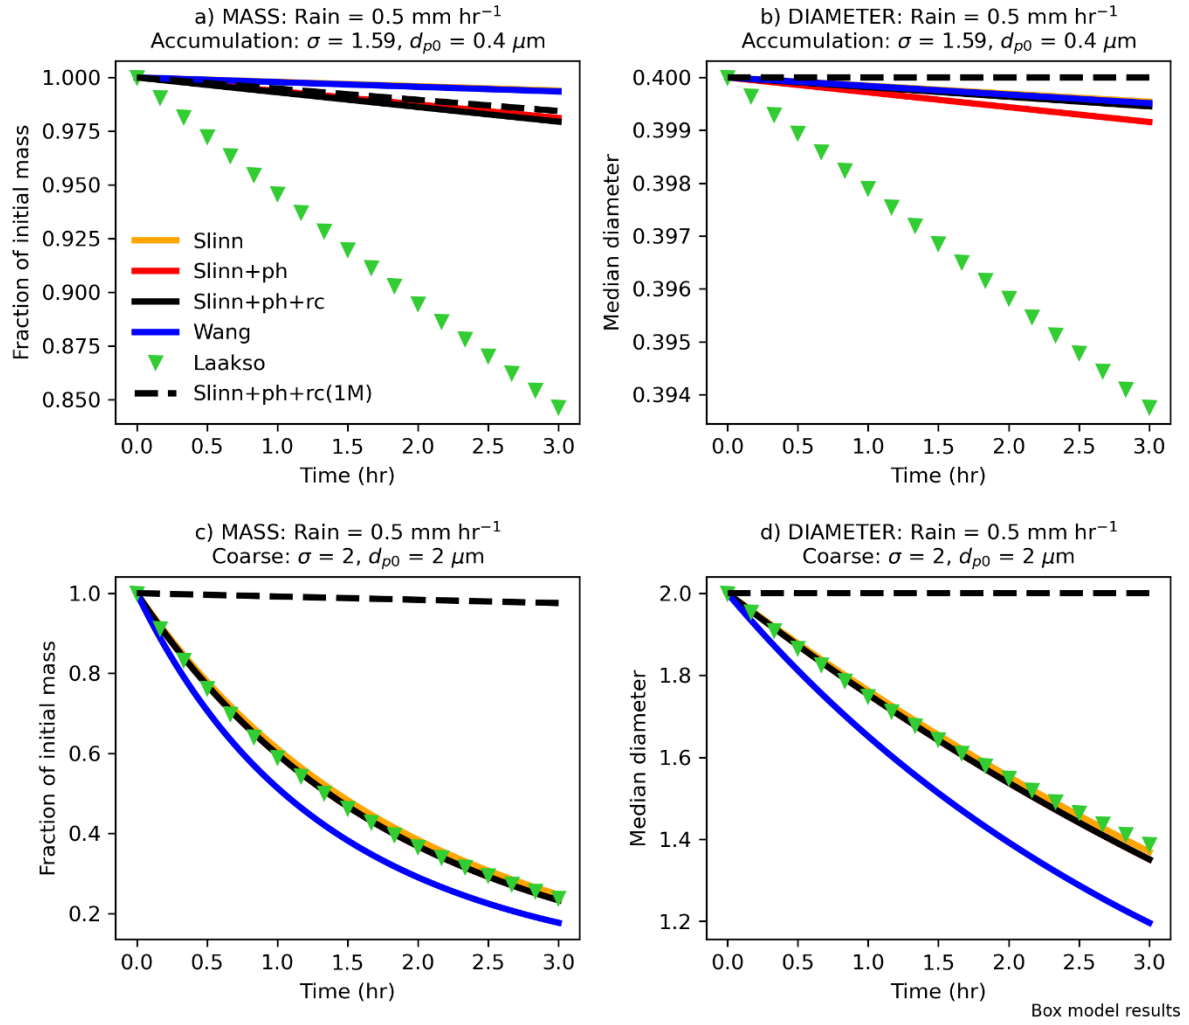

**Figure S5a. Time evolution of the (a,c) mass concentration and (b,d) median diameter of (a-b) an accumulation-like mode and (c-d) a coarse-like mode with a constant rain rate of  $0.5 \text{ mm hr}^{-1}$  for 6 BCS schemes. Results from offline box model simulations**



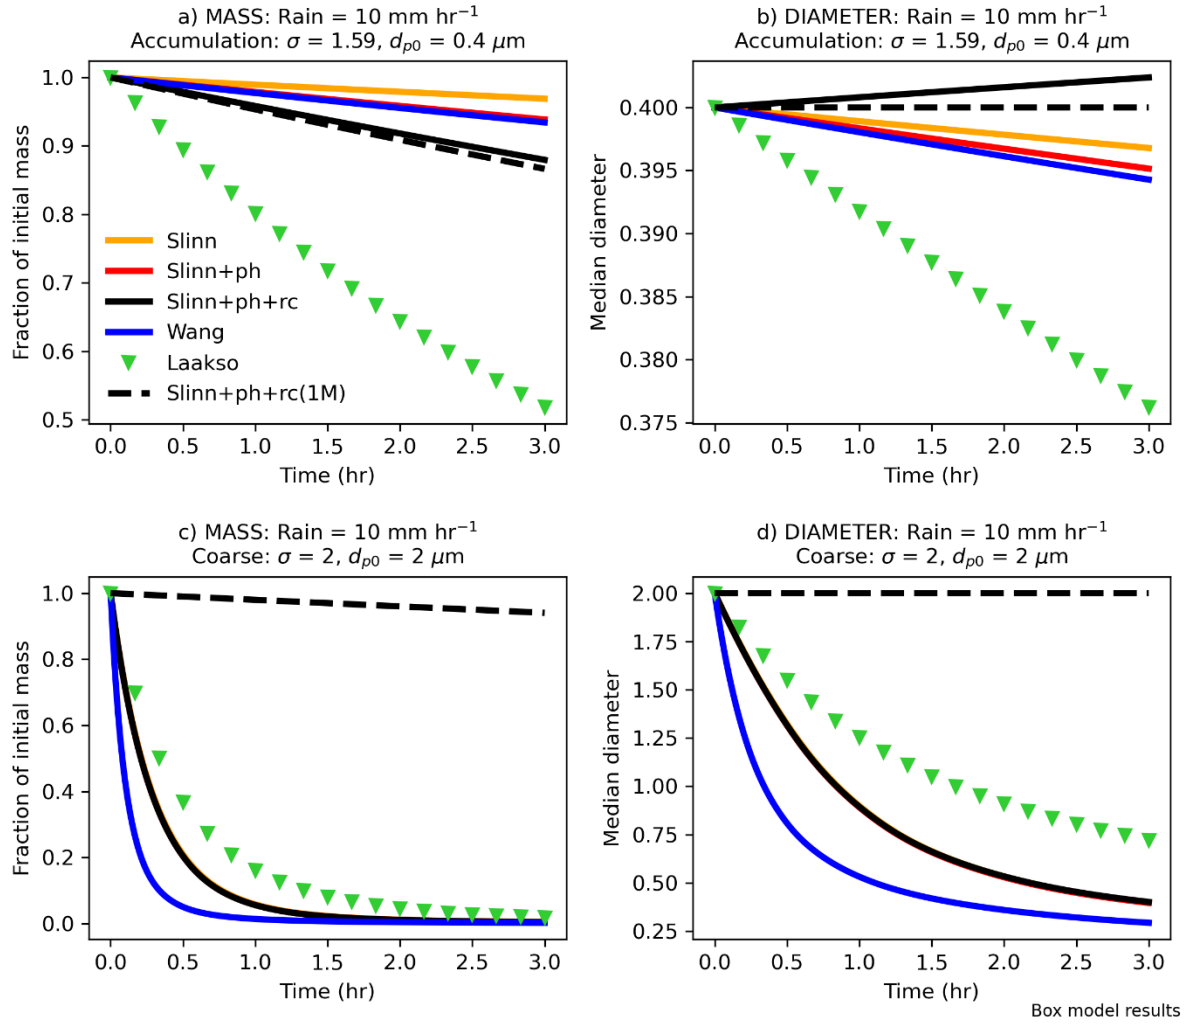

**Figure S5b. Time evolution of the (a,c) mass concentration and (b,d) median diameter of (a-b) an accumulation-like mode and (c-d) a coarse-like mode with a constant rain rate of  $10 \text{ mm hr}^{-1}$  for 6 BCS schemes. Results from offline box model simulations**

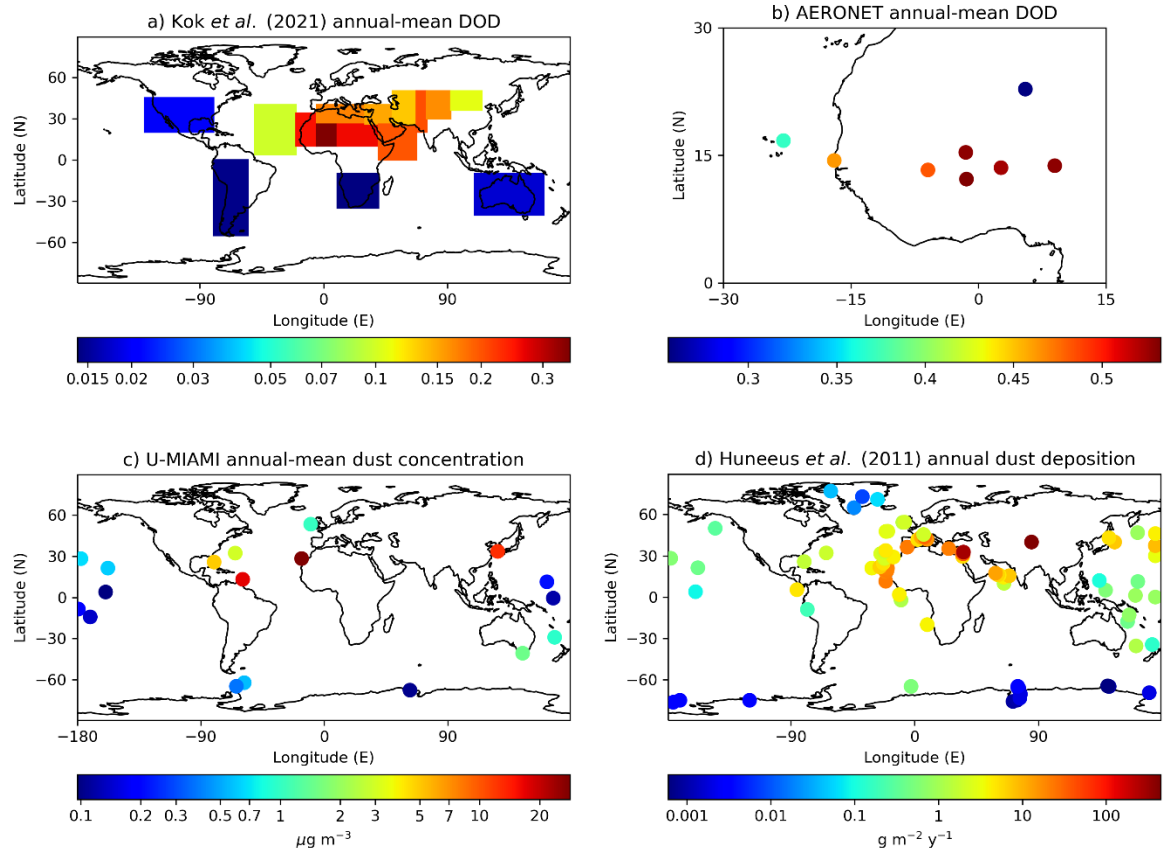

**Figure S6.** Annual-mean values by area or station from 4 datasets used to assess simulated dust in the UM-GA8.0 simulations: (a) 550 nm dust optical depth (DOD) from Kok *et al.* (2021), (b) 440 nm DOD from AERONET measurements (Table S3), (c) near surface dust concentration from the U-MIAMI dataset (Table S4, Prospero and Nees, 1986), and (d) dust deposition rates from Huneus *et al.* (2011)

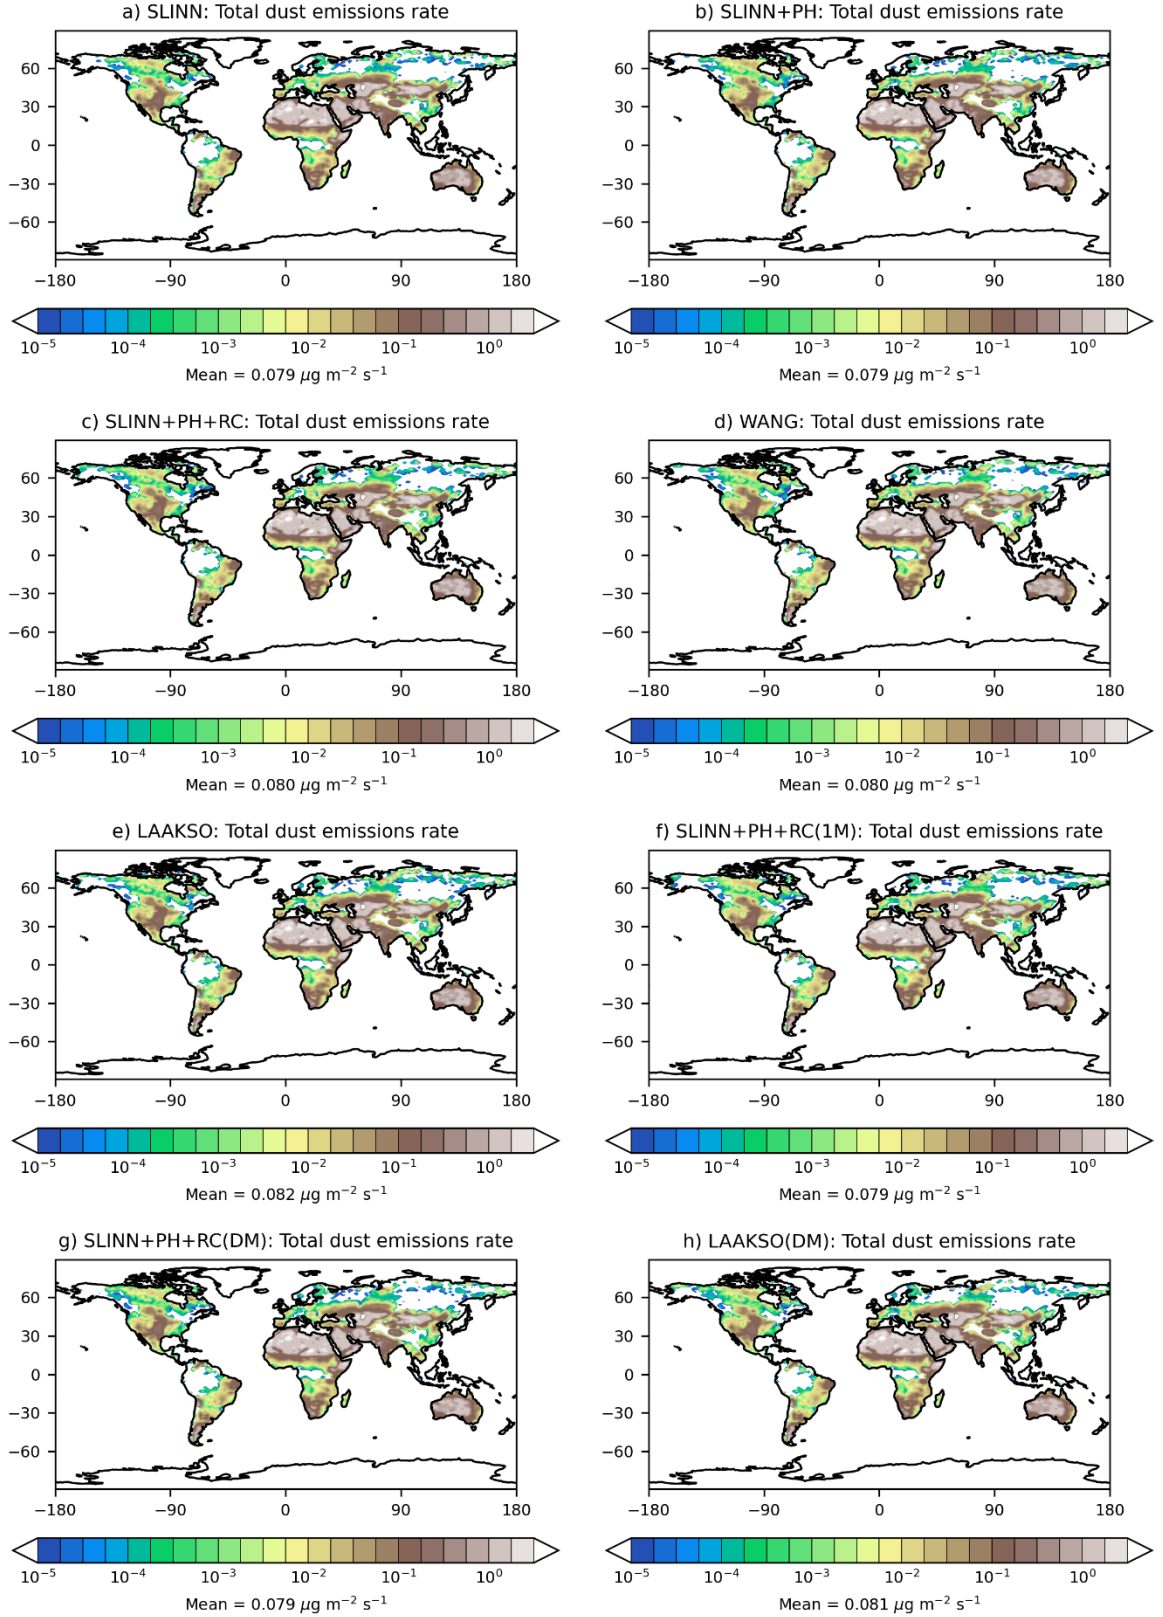

**Figure S7.** Annual-mean total dust emissions rate in all of the UM-GA8.0 simulations performed for this study

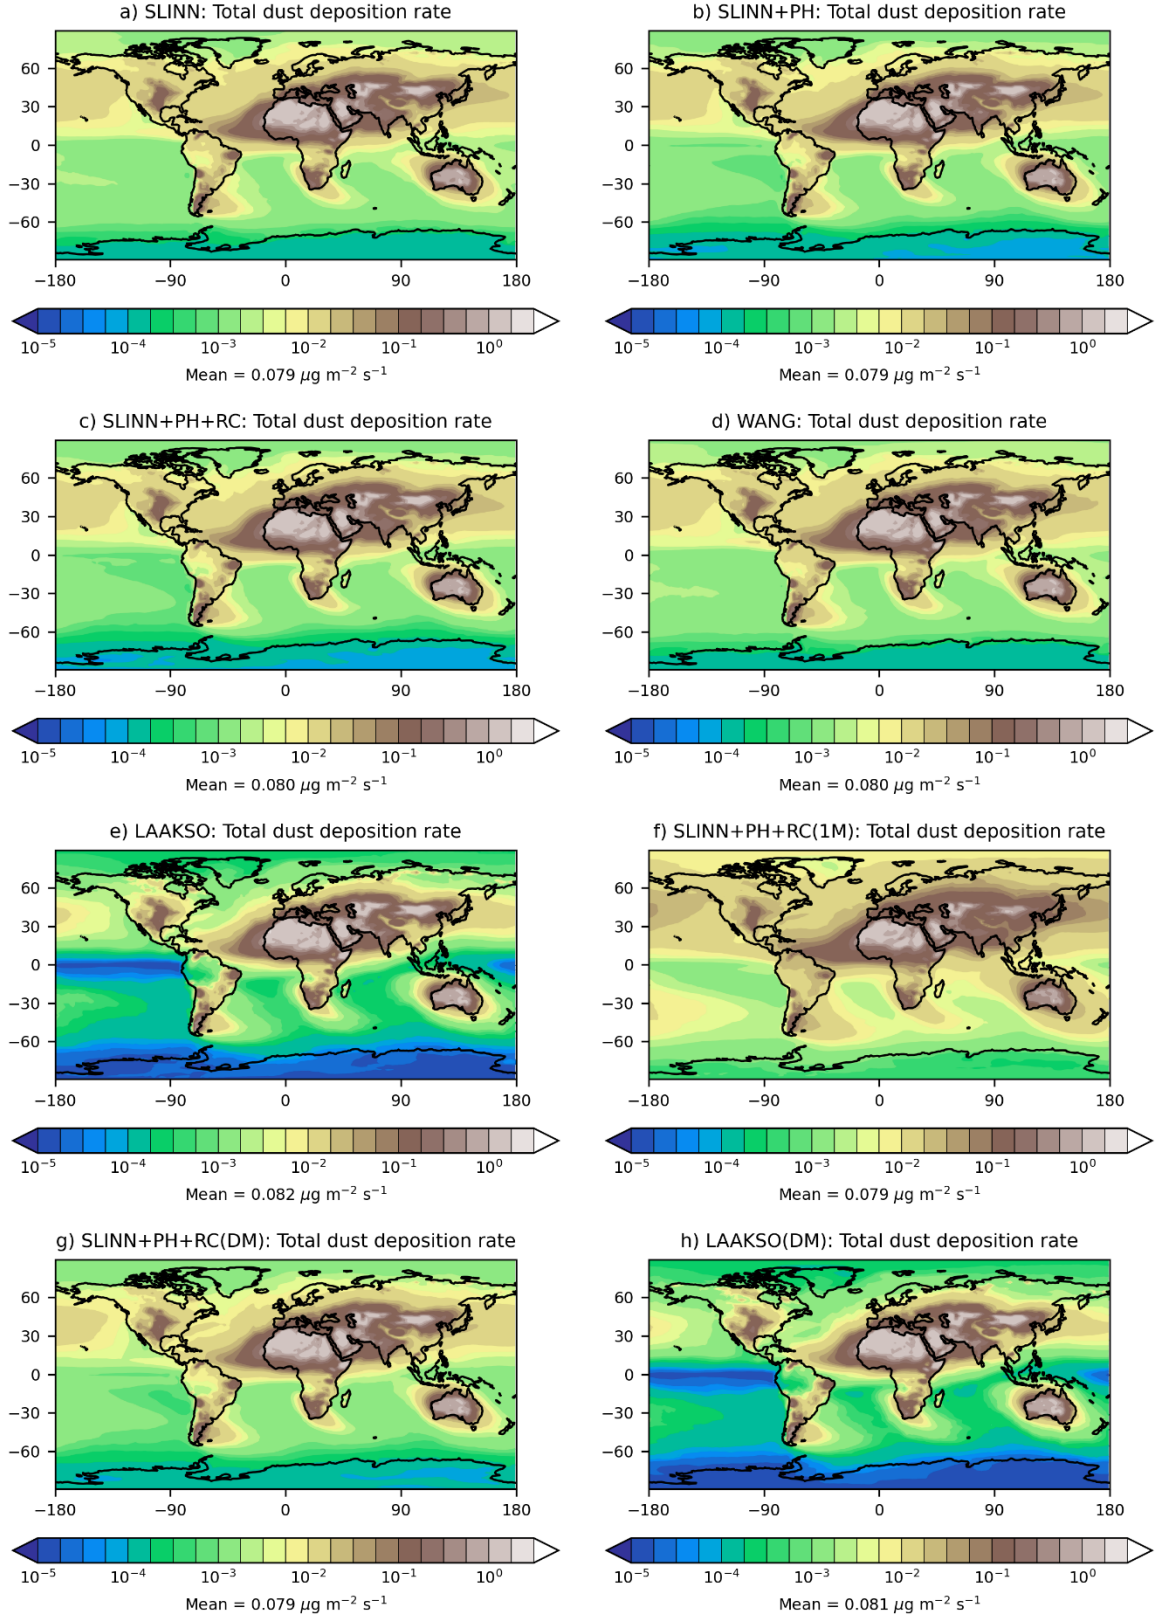

**Figure S8. Annual-mean total dust deposition rate in all of the UM-GA8.0 simulations performed for this study**

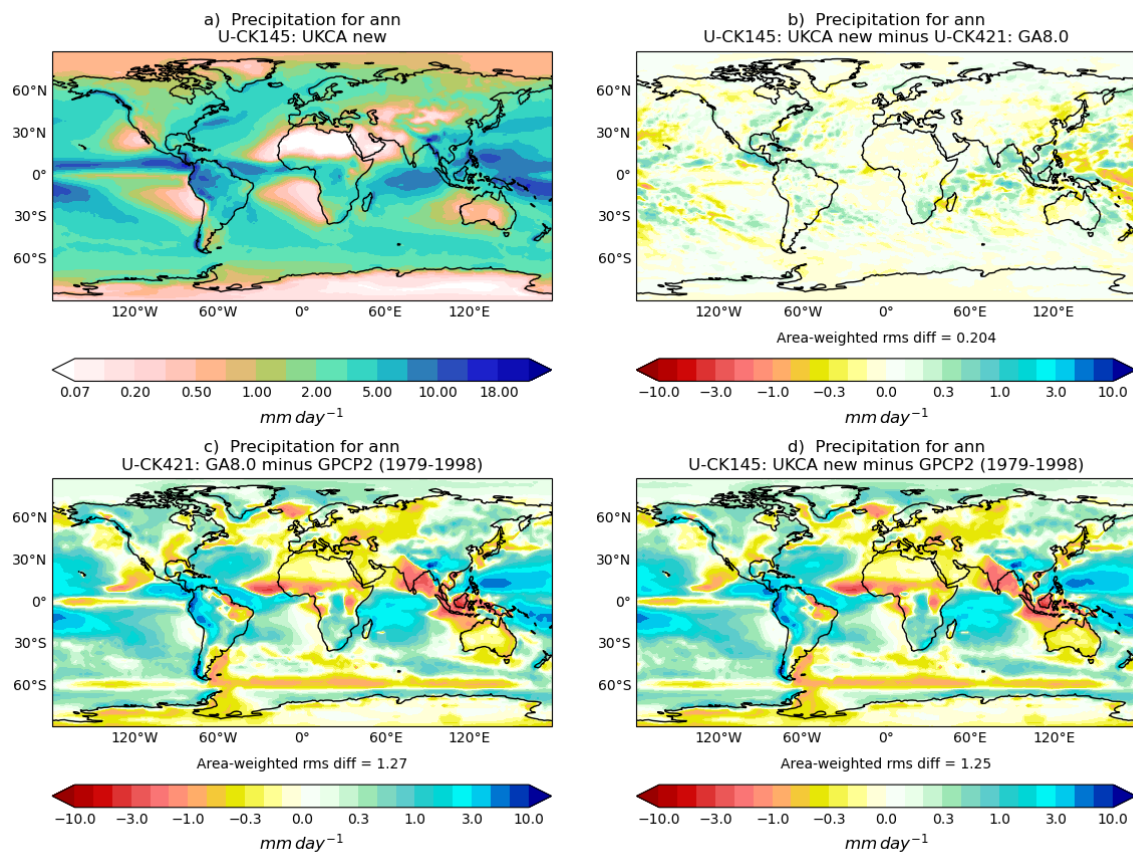

**Figure S9. Annual-mean precipitation anomalies with respect to observations from the Global Precipitation Climatology Project (GPCP2) (Adler *et al.*, 2003). (a) Annual mean precipitation in the SLINN+PH+RC simulation (i.e., u-ck145, (b) the difference between precipitation in SLINN+PH+RC and the default UM-GA8.0 model (i.e., u-ck421) which employs CLASSIC dust, (c) the difference between precipitation in default UM-GA8.0 and GPCP2, and (d) the difference between precipitation in SLINN+PH+RC and GPCP2**

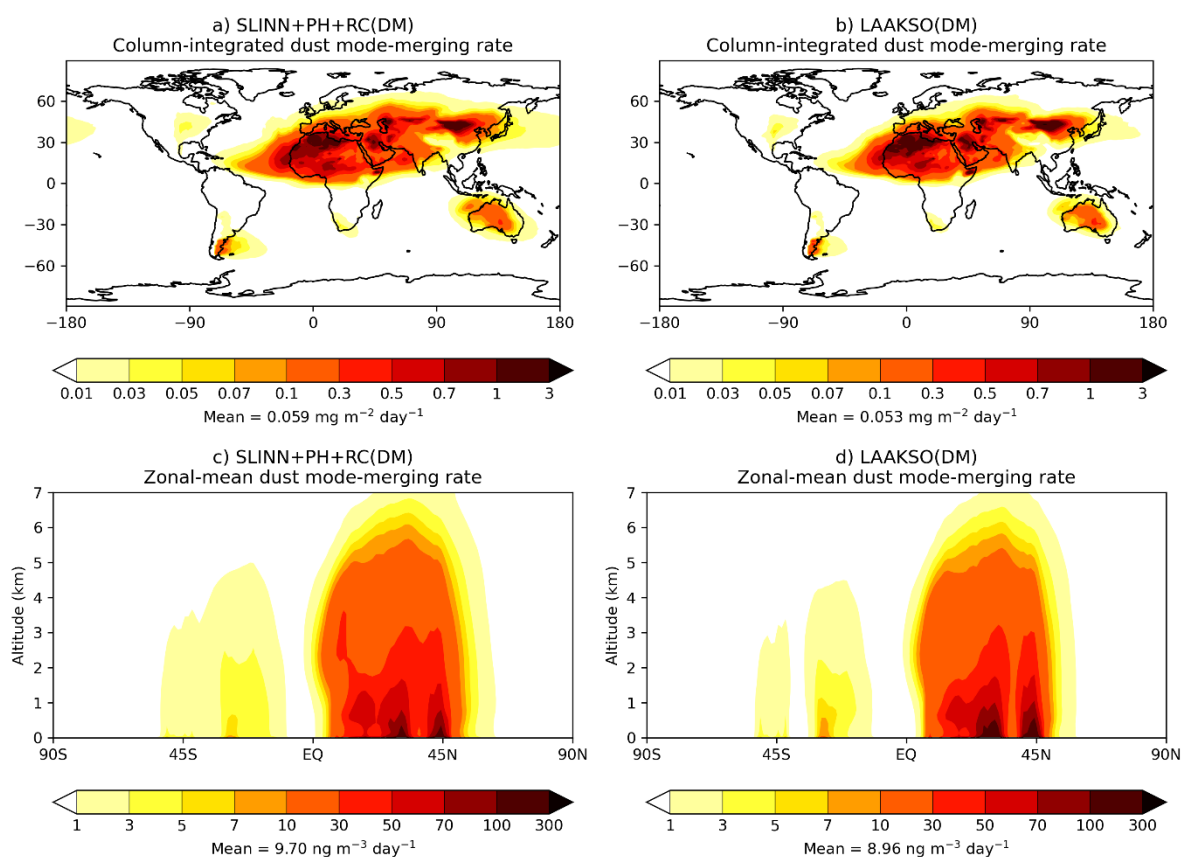

**Figure S10. Annual-mean dust mode merging rate (coarse mode  $\rightarrow$  accumulation mode): (a) integrated vertically in SLINN+PH+RC(DM), (b) integrated vertically in LAAKSO(DM), (c) zonally averaged in SLINN+PH+RC(DM), and (d) zonally averaged in LAAKSO(DM)**



## BCS sensitivity to mode-merging (LAAKSO)

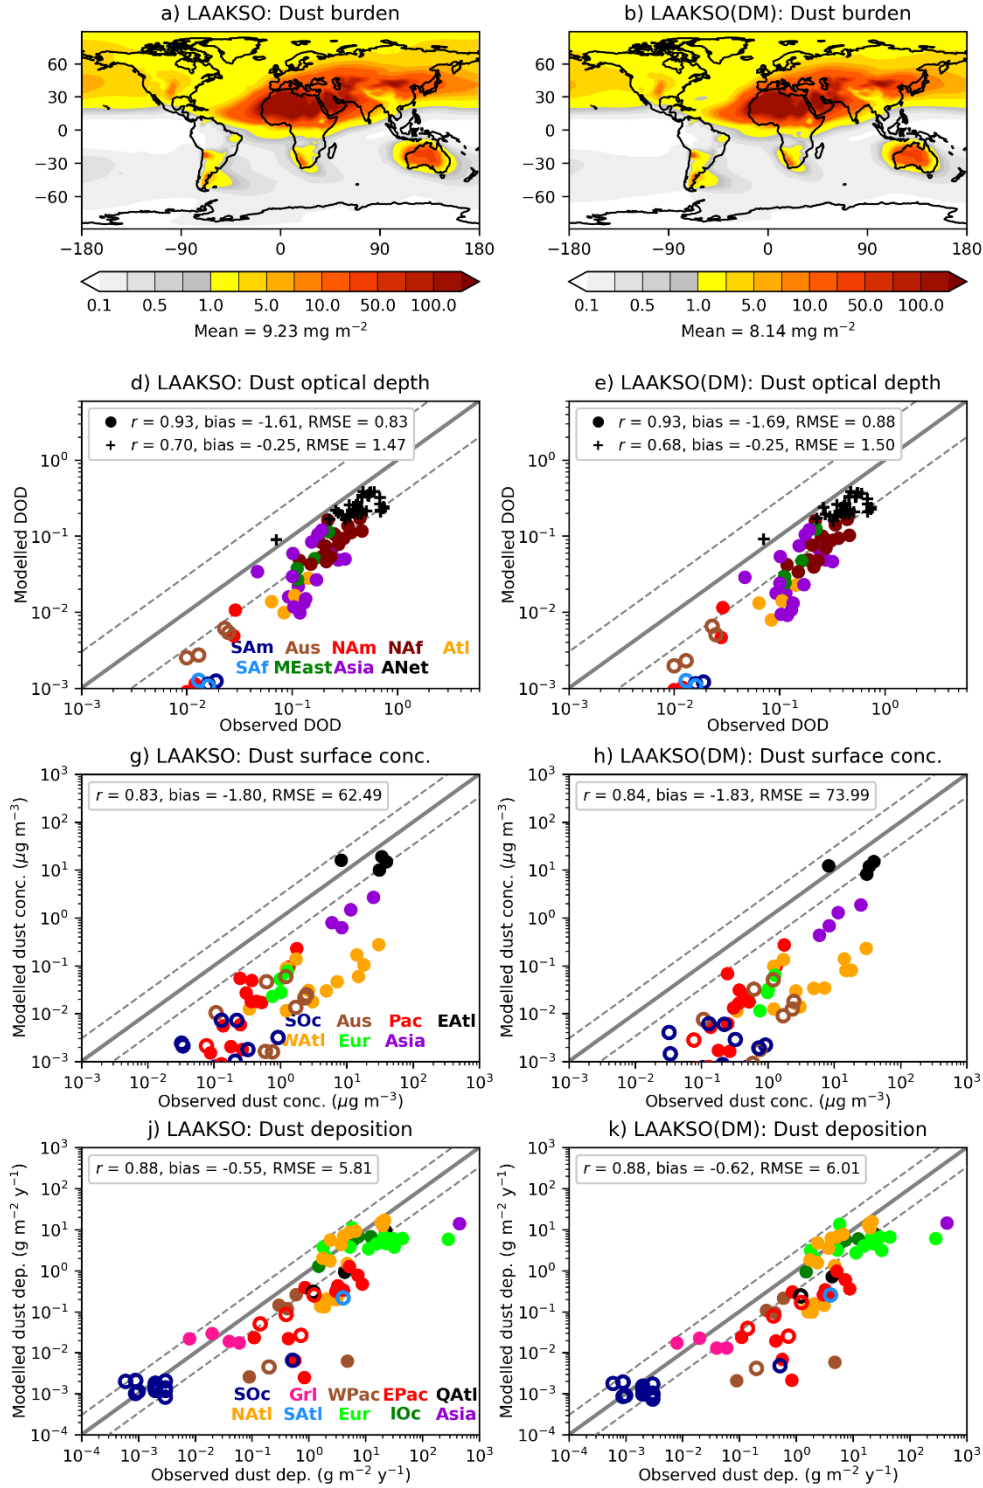

**Figure S11. Global dust metrics in the LAAKSO and LAAKSO(DM) simulations, used to answer KQ4 – impact of representing downward mode-merging. (a-c) annual-mean total dust burden, (d-f) seasonal and regional dust optical depths (DOD) against 440nm AERONET observations (+) and 550nm DOD from Kok *et al.* (2021), (g-i) seasonal and regional near surface dust concentrations against U-MIAMI observations (Prospero and Nees, 1986), (j-l) annual-mean regional dust deposition rates against observations from Huneeus *et al.* (2011)**

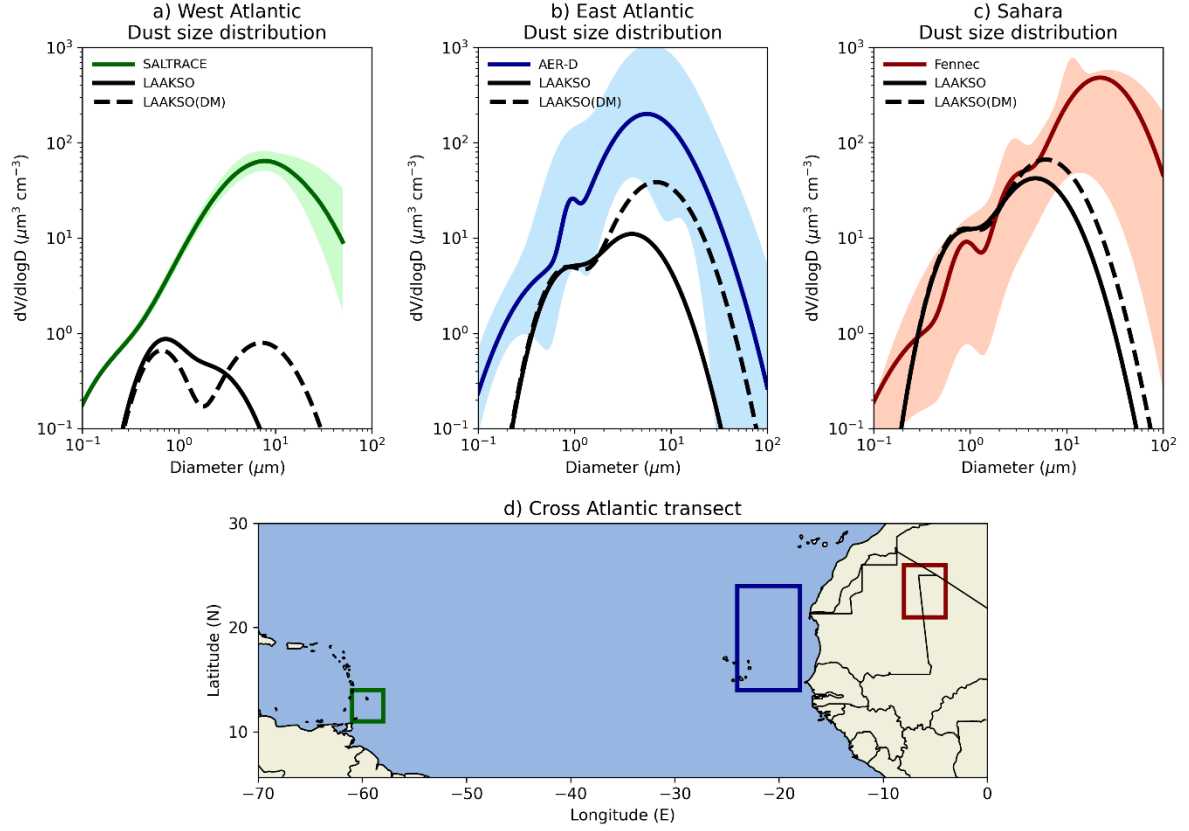

**Figure S12. Dust volume size distributions in a cross Atlantic transect in the LAAKSO and LAAKSO(DM) simulations for (a) June conditions in the region (58-61 °W, 11-14 °N) and 2-2.4 km compared to SALTRACE measurements, (b) August conditions in the region (18-24 °W, 14-24 °N) and 2-3 km altitude compared to AER-D measurements, and (c) June conditions in the region (4-8 °W, 21-26 °N) and 0.1-1.2 km altitude compared to Fennec 2011 measurements. (d) shows the horizontal boundaries of the averaging regions in the Equatorial Atlantic**



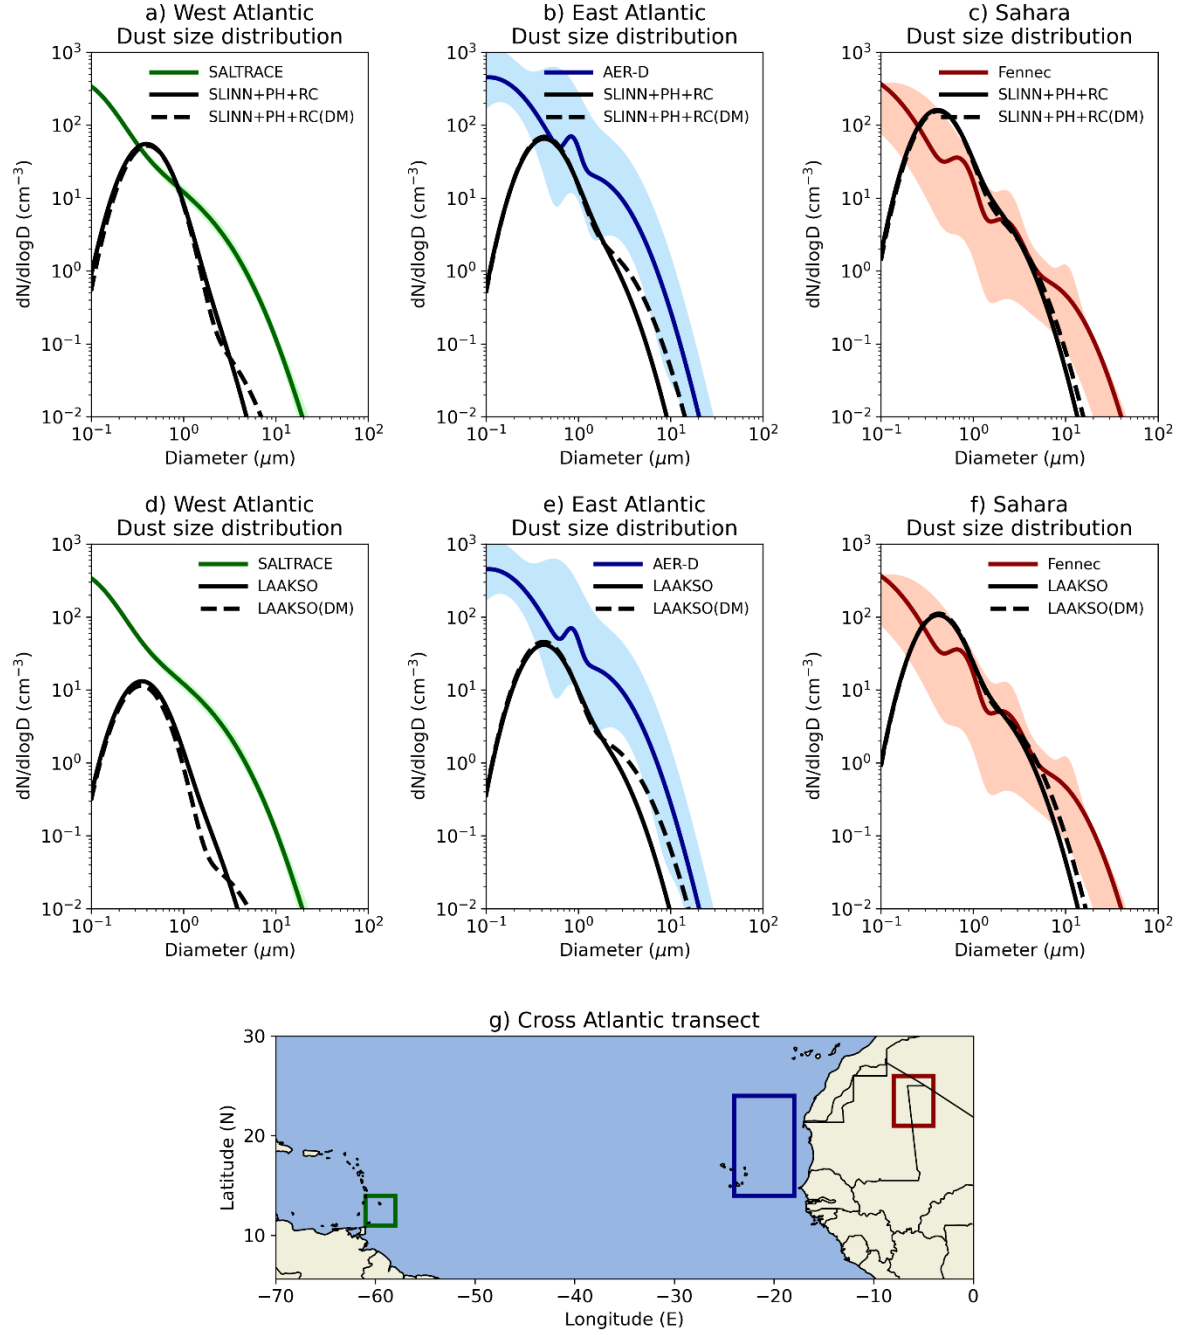

**Figure S13. Dust number size distributions in a cross Atlantic transect in the SLINN+PH+RC and SLINN+PH+RC(DM) simulations (a-c) and LAAKSO and LAAKSO(DM) simulations (d-f) for: (a,d) June conditions in the region (58-61 °W, 11-14 °N) and 2-2.4 km compared to SALTRACE measurements, (b,e) August conditions in the region (18-24 °W, 14-24 °N) and 2-3 km altitude compared to AER-D measurements, and (c,f) June conditions in the region (4-8 °W, 21-26 °N) and 0.1-1.2 km altitude compared to Fennec 2011 measurements. (g) shows the horizontal boundaries of the averaging regions in the Equatorial Atlantic**
